- 1 1. Title: New tools for diet analyses: nanopore sequencing of metagenomic DNA from  
2 stomach contents to quantify diet in an invasive population of rats
- 3 2. Authors: William Pearman, Adam N. H. Smith, Georgia Breckell, James Dale, Nikki E.  
4 Freed, Olin K. Silander
- 5 3. Addresses of all authors: Institute of Natural and Mathematical Sciences, Massey  
6 University, Auckland 0745, New Zealand
- 7 4. Keywords: Nanopore sequencing, diet analysis, rat, invasive
- 8 5. Communicating authors: Olin K. Silander, Institute of Natural and Mathematical  
9 Sciences, Massey University, Auckland 0745, New Zealand, [olinsilander@gmail.com](mailto:olinsilander@gmail.com),  
10 +64 9 213 6618; Nikki E. Freed, Institute of Natural and Mathematical Sciences, Massey  
11 University, Auckland 0745, New Zealand, [freednikki@gmail.com](mailto:freednikki@gmail.com), +64 9 213 6639
- 12 6. Running title: Quantifying rat diets by direct nanopore sequencing
- 13

## 14 Abstract

15 Introduced species of mammals in New Zealand have had catastrophic effects on  
16 populations of diverse native species. Quantifying the diets of these omnivorous and  
17 predatory species is critical for understanding which native species are most impacted,  
18 and to prioritize which mammal species and locations should be targeted with control  
19 programmes. A variety of methods have been applied to quantify diet components in  
20 animals, including visual inspection of gut contents (Daniel 1973; Pierce and Boyle  
21 1991), stable isotope analysis (Major et al. 2007; Carreon-Martinez and Heath 2010),  
22 and time-lapse video (Brown and Brown 1997; Dunlap and Pawlik 1996). Increasingly,  
23 DNA-based metabarcoding methods are being used (King et al. 2008; Soininen et al.  
24 2009). These metabarcoding methods require a PCR step using primers that bind to  
25 highly conserved genomic regions (e.g. mitochondrial COI) to amplify specific regions  
26 for sequencing. This step introduces significant bias, primarily due to the lack of a  
27 universal primer set (King et al. 2008). Here we show that direct metagenomic  
28 sequencing using the Oxford Nanopore Minion allows rapid quantification of rat diets.  
29 Using a sample of rats collected from within 100km of Auckland, NZ, we show that  
30 these rats consume a wide variety of plant, invertebrate, vertebrate, and fungal taxa,  
31 with substantial differences in diet content between locales. We then show that, based  
32 on diet content alone, it is possible to pinpoint the sampling location of an individual rat  
33 within tens of kilometres. We expect that the rapidly increasing accuracy and  
34 throughput of nanopore-based sequencing, as well as increases in the species  
35 diversity of genomic databases, will soon allow rapid and unbiased assessments of  
36 animal diets in field settings.

## 37 Introduction

38 The relatively recent introduction of mammalian species to New Zealand has had  
39 significant negative effects on many of the native animal populations, including insects  
40 (Gibbs 1998), reptiles (Towns, Daugherty, and Cree 2001), molluscs (Stringer et al.  
41 2003), and birds (Diamond and Veitch 1981; Dowding and Murphy 2001). These  
42 mammalian predators include possums, rats, stoats, and hedgehogs, as well as  
43 domestic pets such as cats (Gillies and Clout 2003). Currently, an ambitious plan is  
44 being put into place that aims for the eradication of all mammalian predators by 2050  
45 (<http://www.doc.govt.nz/predator-free-2050>; Russell et al. 2015). A useful step toward  
46 this goal would be to prioritise the management of predators and geographical areas in  
47 which native species are experiencing the highest levels of predation. To do so requires  
48 establishing the diet content of these predators.

49 Unbiased and sensitive assessment of diet content is extremely difficult to achieve due  
50 to the limited accuracy of available methods. Identification of prey items using visual  
51 examination of stomach contents is strongly affected by which items are most easily  
52 degraded (for example, soft-bodied species). Stable isotope analysis is imprecise,  
53 yielding only broad information on diet such as relative consumption of protein and plant  
54 matter, as well as information on whether prey items are terrestrial or marine in origin  
55 (Hobson 1987; Basha et al. 2016). Time-lapse video (Brown et al. 2008) requires  
56 identification of the specific prey item, often difficult or impossible for small prey items or  
57 in low-light conditions.

58 Perhaps the most widely applied current molecular method is DNA metabarcoding. This  
59 approach relies on the PCR amplification and DNA sequencing of conserved regions  
60 from nuclear, mitochondrial, and/or plastid genomes (King et al. 2008). With adequate  
61 primer selection, this method can detect a wide range of species, and does not require  
62 specific expertise necessary for other methods (for example identifying degraded prey  
63 items).

64 However, DNA metabarcoding is not free from bias. PCR primers must be specifically  
65 tailored to particular sets of taxa or species (Jarman et al. 2002). Although more  
66 “universal” PCR primer pairs have been developed (for example targeting all bilaterians  
67 or even all eukaryotes; (Jarman, Deagle, and Gales 2004), all primer sets exhibit bias  
68 towards certain taxa. Tedersoo et al. (Tedersoo et al. 2015) found five-fold differences  
69 in fungal operational taxonomic units (OTU) estimates when using different sets of  
70 fungal-specific PCR primer pairs. Leray et al. (Leray et al. 2013) found that published  
71 universal primer pairs (i.e. those that do not target specific taxa) were capable of  
72 amplifying only between 57% and 91% of tested metazoan species, with as few as 33%  
73 of species in some phyla being amplified at all (e.g. cnidarians). Deagle et al. argued  
74 that in general, COI regions are simply not sufficiently conserved, and thus should not  
75 be used for metabarcoding studies at all (Deagle et al. 2014). Finally, Pawluczyk et al.  
76 showed that different loci from the same species exhibit up to 2,000-fold differences in  
77 qPCR-estimated DNA quantity within samples (Pawluczyk et al. 2015). It has even been  
78 shown that the polymerase itself can bias diversity metrics when using metabarcoding  
79 methods (Pereira et al. 2018). For these reasons, a less biased molecular-based  
80 method is desirable.

81 Metagenomic approaches, in which all DNA in the sample is directly sequenced, offer a  
82 promising alternative. Such methods have been used for diet analysis in only very few  
83 and recent instances (Srivathsan et al. 2015; Paula et al. 2015; Srivathsan et al. 2016).  
84 Although metagenomic approaches decrease the bias arising from PCR amplification of  
85 specific DNA regions, additional biases can arise, as the presence or absence of  
86 species and genera can only be inferred for those species or genera present in genomic  
87 databases. Although this is similarly true for metabarcoding approaches, metabarcode  
88 databases are considerably more comprehensive in terms of species representation as  
89 compared to genomic databases. Importantly, genomic sequence databases are rapidly  
90 increasing in species diversity, as are the methods to query these large databases  
91 (Wood and Salzberg 2014; Kim et al. 2016).

92 Here, we quantify rat diet composition using a metagenomic approach based on  
93 nanopore sequencing (Oxford Nanopore Technologies). The data suggest that rat diets  
94 around Auckland, New Zealand, comprise a wide range of plant, animal, and fungal  
95 families. We show using multivariate analyses that rat diets are distinguishable by  
96 habitat and location. This work establishes long-read metagenomic methods as a  
97 straightforward approach for diet quantification.

## 98 Materials and Methods

### 99 Study Areas

100 We trapped rats from three locations near Auckland, New Zealand. Each location  
101 comprised a different type of habitat: undisturbed inland native forest (Waitakere  
102 Regional Parklands, WP); native bush surrounding an estuary (Okura Bush Walkway,  
103 OB); and restored coastal wetland (Long Bay Regional Park, LB) (**Fig. 1**). Traps in OB  
104 and LB were baited with peanut butter, apple, and cinnamon wax pellets; or bacon fat  
105 and flax pellets. Traps in WP were baited with chicken eggs, rabbit meat, or cinnamon  
106 scented poison pellets. From 16 November to 16 December 2016, traps were surveyed  
107 by established volunteer conservation groups at each site every 48 hours. A total of 36  
108 rats were collected from these locations. The majority of rats collected (34/36) were  
109 determined to be male by visual inspection, and identified as *Rattus norvegicus*. These  
110 34 rats were selected for further analysis.

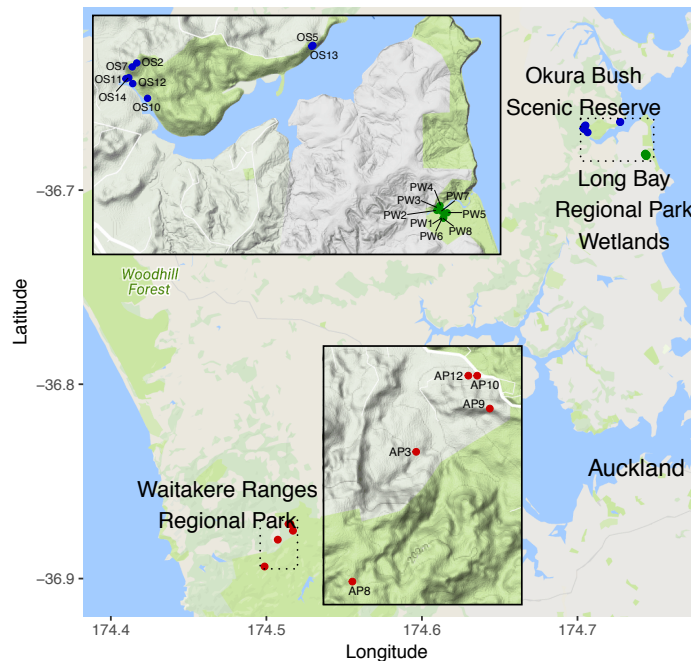

111 **Fig. 1. Location of rat sampling sites** in the greater Auckland area in the North Island  
112 of New Zealand. Each point indicates a trap where one rat was captured, with the colour  
113 of the points indicating the three broad locations: the native estuarine bush habitat of  
114 Okura Bush (OB), the restored wetland of Long Bay (LB), and the native forest of  
115 Waitakere Park (WP). The two insets show the three locations in higher resolution with  
116 topographical details. Green indicates park areas. Precise geographical coordinates  
117 were only available for five out of eight rats in WP.

118

## 119 DNA Isolation

120 Within 48 hours of trapping, rats were stored at either -20°C or -80°C until dissection.  
121 We removed intact stomachs from each animal, rinsed them with 70% ethanol, and  
122 removed the contents. After snap freezing in liquid nitrogen, we homogenised the  
123 stomach contents using a sterile mini blender to ensure sampling was representative of  
124 the entire stomach.

125 We purified DNA from 10-20 mg of homogenised stomach contents using the Promega  
126 Wizard Genomic DNA Purification Kit, with the following modifications to the Animal  
127 Tissue protocol: after protein precipitation, we transferred the supernatant to a new tube  
128 and centrifuged a second time to minimise protein carryover. The DNA pellet was  
129 washed twice with ethanol. These modifications were performed to improved DNA  
130 purity. We rehydrated precipitated DNA by incubating overnight in molecular biology  
131 grade water at 4°C and stored the DNA at -20°C. DNA quantity, purity, and quality was  
132 ascertained by nanodrop and agarose gel. The DNA samples were ranked according  
133 quantity and purity (based on A260/A280 and secondarily, A230/A280 ratios). The eight  
134 highest quality DNA samples from each location were selected for DNA sequencing.

### 135 DNA Sequencing

136 Sequencing was performed on two different dates (24 January 2017 and 17 March  
137 2017) using a MinION Mk1B device and R9.4 chemistry. For each sequencing run, DNA  
138 from each rat was barcoded using the 1D Native Barcoding Kit (Barcode expansion kit  
139 EXP-NBD103 with sequencing kit SQK-LSK108) following the manufacturer's  
140 instructions. Twelve samples were pooled and run on each flow cell, for a total of 24  
141 individual rats. The flow cells had 1373 active pores (January) and 1439 active pores  
142 (March). Sequencing was performed using local base calling in MinKnow v1.3.25  
143 (January) or MinKnow v1.5.5 (March), but both runs were re-basecalled after data  
144 collection using Albacore 2.2.7 with the following command: *read\_fast5\_basecaller.py -i*  
145 *./fast5\_input -t 48 -s basecalled\_output -f FLO-MIN106 -k SQK-LSK108 --barcoding -r -*  
146 *o fastq,fast5 -q 0 --disable\_filtering.*

### 147 Sequence classification

148 All sequences were BLASTed (blastn v2.6.0+) against a locally compiled database  
149 consisting of the combined NCBI other\_genomic and nt databases (downloaded on 13<sup>th</sup>  
150 June 2018 from NCBI). Default blastn parameters were used (gapopen 5, gapextend 2),  
151 and only hits with an e-value of 0.01 or less were retained. Due to the predominance of

152 short indels present in nanopore sequence data, we used the datasets basecalled in  
153 January and March of 2017 to test whether changing these default penalties affected  
154 the results (gapopen 1, gapextend 1). We found that these adjusted parameters did not  
155 qualitatively change our results.

156 We assigned sequence reads to specific taxon levels using MEGAN6 (v.6.11.7 June  
157 2018) (Huson et al. 2016). We only used reads with BLAST hits having an e-value of  
158  $1 \times 10^{-20}$  or lower (corresponding to a bit score of 115 or higher) and an alignment length  
159 of 100 bp or more. To assign reads to taxon levels, we considered all hits having bit  
160 scores within 20% of the bit score of the best hit (MEGAN parameter Top Percent).

#### 161 Statistical analyses

162 Multivariate analyses were done using the software PRIMER v7 (Clarke and Gorley  
163 2015). The data used in the multivariate analyses were in the form of a sample- (i.e.  
164 individual rat) by-family matrix of read counts. All bacteria, rodent, and primate families  
165 were removed. The majority of rodent hits were to rat and mouse, resulting from the  
166 rats' own DNA (see below). The majority of the primate hits were to human sequences,  
167 which probably resulted from sample contamination.

168 The read counts were converted to proportions per individual rat, by dividing by the total  
169 count for each rat, to account for the fact that the number of reads varied substantially  
170 among rats (Clarke et al. 2006). The proportions were then square-root transformed so  
171 that subsequent analyses were informed by the full range of taxa, rather than just the  
172 most abundant families (Clarke and Green 1988). We then calculated a matrix of Bray-  
173 Curtis dissimilarities, which quantified the difference in the gut DNA of each pair of rats  
174 based on the square-root transformed proportions of read counts across families  
175 (Clarke et al. 2006).

176 We used unconstrained ordination (specifically, non-metric multidimensional scaling  
177 (nMDS)) applied to the dissimilarity matrix to examine the overall patterns in the diet  
178 composition among rats. To assess the degree to which the diet compositions of rats



179 were distinguishable among the three locations, we applied canonical analysis of  
180 principal coordinates (CAP) (Anderson and Willis 2003) to the dissimilarity matrix. CAP  
181 is a constrained ordination which aims to find axes through multivariate data that best  
182 separates *a priori* groups of samples (in this case, the groups are the locations from  
183 which the rats were sampled); it is akin to linear discriminant analysis but CAP can be  
184 used with any resemblance matrix. The out-of-sample classification success was  
185 evaluated using a leave-one-out cross-validation procedure (Anderson and Willis 2003).

186 We used Similarity Percentage (SIMPER) (Clarke 1993) to characterise taxa that  
187 distinguished between the locations. This allowed us to identify the families with the  
188 greatest percentage contributions to (1) the Bray-Curtis similarities of diets within each  
189 location and (2) the Bray-Curtis dissimilarities between each pair of locations.

## 190 Results

### 191 DNA sequencing and assignment of reads to taxa

192 After DNA isolation and sequencing, we obtained a total of 82,977 reads from the  
193 January sequencing run and 96,150 reads from the March run. Median read lengths  
194 were 606 bp and 527 bp for the January and March datasets, respectively (**Fig. 2A**).  
195 These lengths are considerably shorter than other nanopore sequencing results from  
196 both our and others work (Jain et al. 2016). This is most likely due to degradation of the  
197 DNA during digestion in the stomach as well as fragmentation during DNA isolation  
198 (Deagle, Eveson, and Jarman 2006) and sequencing library preparation. The median  
199 quality scores per read ranged from 7-12 (0.80 - 0.94 accuracy) for both runs (**Fig. S1**).  
200 The number of reads per barcoded rat sample varied by 10-fold for January and up to  
201 40-fold in March (**Fig. 2B** and **2C**). This is primarily due to the highly variable quality of  
202 DNA in each sample. However, read length and quality were similar for all samples  
203 (**Fig. S1**).

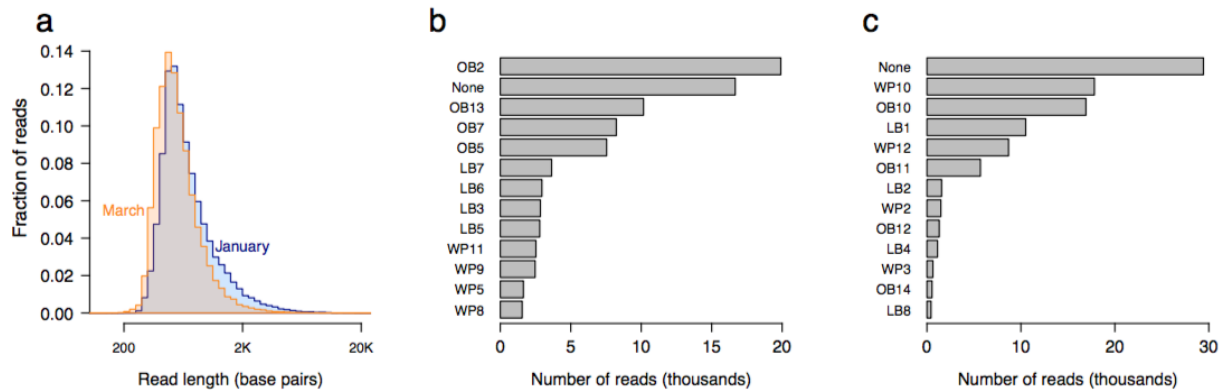

204

205 **Fig. 2. Results of nanopore metagenomic sequencing of rat stomach contents. (a)**  
206 **Read length distribution for January and March nanopore runs.** Read lengths  
207 varied between 300 and 3,000 bp. **(b) and (c) Barcode distributions for January and**  
208 **March runs, respectively.** We multiplexed the samples on the flow cells, using 12  
209 barcodes per flow cell. The distribution of read numbers across barcodes was quite  
210 uneven, varying by up to 40-fold in some cases. 20% (January) and 30% (March) of all  
211 reads could not be assigned to a barcode (“None”). The inability to assign these reads  
212 to a barcode is due primarily to their lower quality.

213

214 To quantify diet contents we first BLASTed all sequences against a combined database  
215 of the NCBI nt database (the partially non-redundant nucleotide sequences from all  
216 traditional divisions of GenBank excluding genome survey sequence, EST, high-  
217 throughput genome, and whole genome shotgun  
218 (<ftp://ftp.ncbi.nlm.nih.gov/blast/db/README>)) and the NCBI other\_genomic database  
219 (RefSeq chromosome records for non-human organisms  
220 (<ftp://ftp.ncbi.nlm.nih.gov/blast/db/README>)). We used BLAST as it is generally viewed  
221 as the gold standard method in metagenomic analyses (McIntyre et al. 2017). Of the  
222 133,022 barcoded reads, 30,535 (23%) hit a sequence in the combined nt and  
223 other\_genomic database at an e-value cut-off of 0.01.

224 As an initial assessment of the quality of these hits, we examined the alignment lengths  
225 and e-values. We found a bimodal distribution of alignment lengths and a highly skewed  
226 distribution of e-values (**Fig. 3A**). We hypothesized that many of the short alignments  
227 with high e-values were false positives. We thus first filtered this hit set, only retaining  
228 BLAST hits with e-values less than  $1e-20$ . Similar quality filters have been imposed  
229 previously (Srivathsan et al. 2015). A total of 22,331 hits passed this filter. Mean read  
230 quality had substantial effects on the rates of BLAST success, with almost 40% of high  
231 accuracy read having hits in the March dataset, as compared to 1% of low accuracy hits  
232 (**Fig. 3B**).

233 To specifically assign each sequence read to a taxon, we analysed the BLAST results in  
234 MEGAN6 (Huson et al. 2016). The algorithm employed in MEGAN6 assigns reads to a  
235 most recent common ancestor (MRCA) taxon level. For example, if a read has BLAST  
236 hits to five species, three of which have bit scores within 20% of the best hit, the read  
237 will be assigned to the genus, family, order, or higher taxon level that is the MRCA of  
238 those best-hit three species (Huson et al. 2007). If a read matches one species far  
239 better than to any other, by definition, the MRCA is that species.

240 Of the reads from the rat stomachs with BLAST hits, 31% were assigned by MEGAN as  
241 being bacterial. 55% of these were *Lactobacillus spp.* These results match previous  
242 studies on rat stomach microbiomes, which have found lactobacilli to be the dominant  
243 taxa (Maurice et al. 2015; Brownlee and Moss 1961; Li et al. 2017; Horáková, Zierdt,  
244 and Beaven 1971). Plant-associated *Pseudomonas* and *Lactococcus* taxa were also  
245 common, at 7% and 6%, respectively.

246

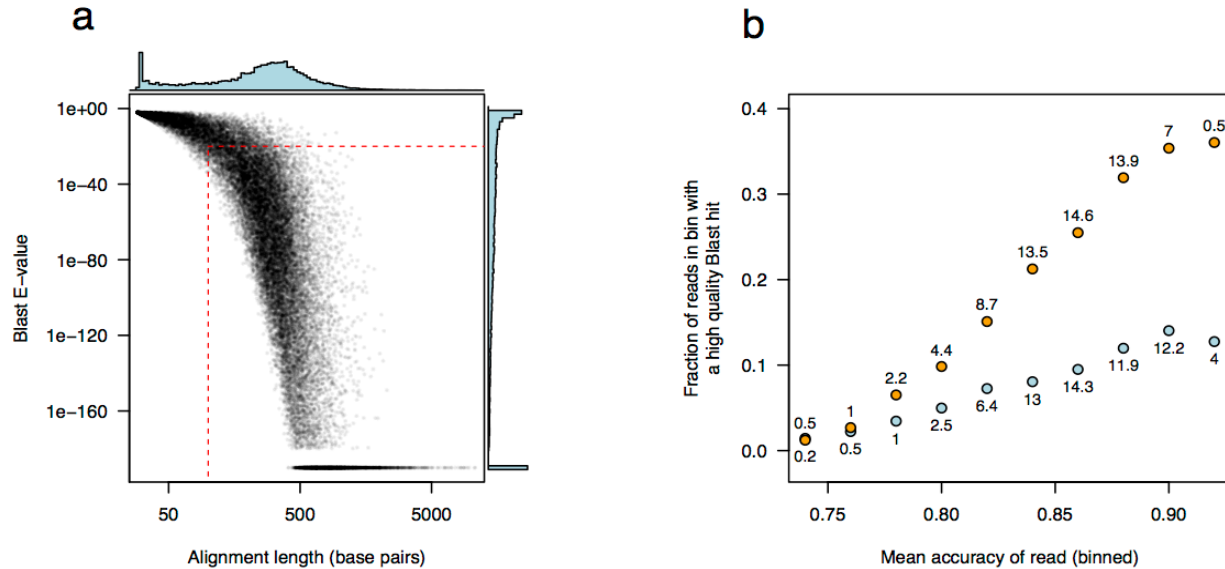

247 **Fig. 3. BLAST hits of metagenomic reads. (a) Biplot showing the e-value and**  
248 **alignment length of the top BLAST hit for each read.** We observed a bimodal  
249 distribution of alignment lengths and a skewed distribution of e-values. The y-axis is  
250 plotted on a log scale, with zero e-values suppressed by adding a small number (1e-  
251 190) to each e-value. The horizontal red dotted line indicates the e-value cut-off we  
252 implemented and the vertical red dotted line indicates the length cut-off (e-value < 1e-20  
253 and alignment length of 100, respectively) to decrease false positive hits. **(b) The**  
254 **fraction of reads with high quality BLAST hits (e-value < 1e-20) increases as a**  
255 **function of read accuracy.** We binned the data according to mean read accuracy (bin  
256 width of 0.02) and calculated the fraction of reads within each bin that had a high quality  
257 BLAST hit for the January and March runs separately (blue and orange points,  
258 respectively). The number of reads in each bin is indicated above or below each point  
259 (in thousands). There is a clear positive correlation between mean accuracy and the  
260 likelihood of a high-quality BLAST hit, reaching almost 40% for very high quality reads  
261 (accuracy greater than 92.5%).

262

263 MEGAN assigned reads to a wide range of eukaryotic taxa. To conservatively infer  
264 taxon presence, we first reclassified MEGAN species-level assignments to the level of  
265 genus. However, after this, many clear false positive assignments remained (e.g. hippo  
266 and naked mole rat). These matches were generally short and of low identity. To reduce  
267 such false positive taxon inferences, we used information from reads assigned to the  
268 genera *Rattus* (rat) and *Mus* (mouse). We inferred that the reads assigned to *Rattus*  
269 (2,696 reads in total) were true positive genus-level assignments and that the reads  
270 assigned to *Mus* (2,798 reads in total) were false positive genus-level assignments (and  
271 not true positive *Mus*-derived reads). Although rats are known to prey on mice  
272 (Bridgman et al. 2013), if this had occurred, we would expect that (1) the ratio of mouse  
273 to rat reads would be higher in the subset of rats that had predated mice; (2) in those  
274 same rats, the percent identity of the reads assigned to *Mus* would be higher than in  
275 rats that had not predated mice. However, we found that the ratio of mouse to rat reads  
276 was similar for all rats, and there was no evidence of higher percent identities for *Mus*  
277 reads from rats that had higher ratios.

278 Notably, the mean percent identity values of the best BLAST hits for these two groups  
279 of reads differed substantially, with *Rattus* reads having a median identity of 86.4%, and  
280 *Mus* 81.0% (**Fig. 4A**). The mean percent identity for *Rattus* reads corresponds very well  
281 to that expected given the mean quality scores of the reads (assuming the true  
282 sequence of the read is 100% identical to *Rattus*, 86.4% identity corresponds to a mean  
283 quality score of 8.7).

284 There was also a clear difference in the alignment lengths: the median ratio of  
285 alignment length to read length was 0.57 for *Rattus* and 0.52 for *Mus* (**Fig. 4B**).  
286 Importantly, the majority of diet items have percent identities that overlap with the  
287 *Rattus* reads, and alignment length to read length ratios that exceed the *Rattus* reads,  
288 suggesting that many diet taxa assignments are correct down to the level of genus.  
289 However, to minimise the rates of false positive taxon assignments of diet items, we  
290 implemented cut-offs based on the characteristics of the *Mus*- and *Rattus*-assigned  
291 reads. For genus-level assignment, we required at least 82.5% identity and an

292 alignment length to read length ratio of at least 0.55. These cut-offs exclude 88% of the  
293 reads falsely assigned to *Mus*, instead assigning them correctly to one taxon level  
294 higher, the Family *Muridae*.

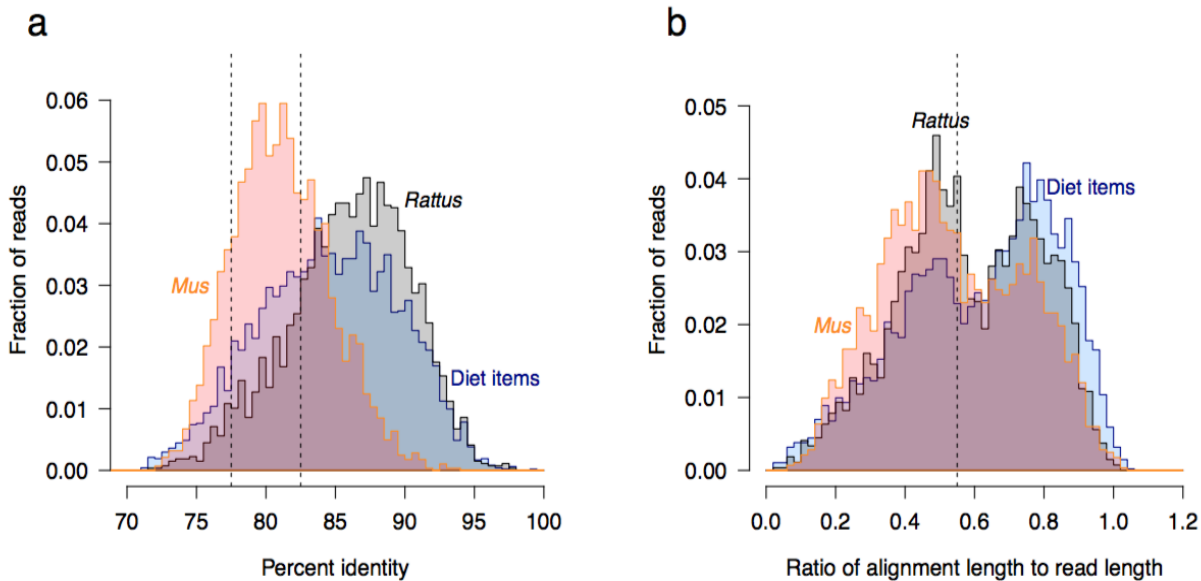

295 **Fig. 4. Distributions of percent identity and length for alignments of reads**  
296 **matching *Rattus* (rat), *Mus* (mouse), and diet items. (a) Percent identity for**  
297 **alignments of rat (*Rattus*) and diet items is much higher than for mouse (*Mus*).**  
298 Histograms are shown for the percent identity of the alignment of the top BLAST hit with  
299 the read. *Mus* matches show a clear shift to the left (lower percent identity) as  
300 compared to *Rattus* and diet items. Although different genera, *Mus* and *Rattus* are in  
301 the same family (*Muridae*). The dotted lines indicate the cut-offs that we implemented  
302 for inferring reads as belonging to a specific genus (above 82.5% identity) or family  
303 (above 77.5% identity). (b) **Ratios of alignment lengths to read lengths of rat**  
304 **(*Rattus*) and diet items are higher than for mouse (*Mus*).** This plot is analogous to  
305 that in (a). The dotted line indicates the cut-off that we implemented for inferring reads  
306 as belonging to a specific genus (above 0.55).

307

308 For family-level assignments, we required 77.5% identity, an alignment length to read  
309 length ratio of at least 0.1, and a total alignment length of at least 150 bp. Using higher  
310 cut-offs for the ratio of alignment length to read length excluded a large number of likely  
311 true positive taxa for which only short mtDNA or rDNA database sequences were  
312 present in the databases. For all other read-to-taxon assignments, we placed the read  
313 at the level of Order, or used the taxon level assigned by MEGAN. Using these cut-offs,  
314 16% of all reads were classified at the Genus level; 71% were classified at the Family-  
315 level or below; 89% were classified at the Order-level or below; and 98% were classified  
316 at the Phylum-level or below.

317 Even though we imposed these relatively stringent filters, we observed that a small  
318 number of likely false positive taxa remained. Most were single reads with short  
319 alignments: *Poeciliidae* (177 bp); *Salmonidae* (172 bp); *Cyprinodontiformes* (140 bp and  
320 177 bp); and *Octopodidae* (151 bp). The exception to this were three reads from two  
321 rats matching *Buthidae* (scorpions), which had alignment lengths of 762 bp, 664 bp, and  
322 298 bp. It is unlikely these are true positives, and instead that these rats predated  
323 harvestmen, a closely related sister taxon within *Arachnida*. Despite the presence of  
324 these false positive taxa, to ensure we could identify the majority of taxa at high  
325 resolution (i.e. family-level), we did not further increase the stringency of our filters.

#### 326 Identification of stomach contents

327 Within each rat, a wide variety of plant, animal, and fungal families and orders were  
328 discernible, ranging from two to 25 orders per rat (mean 8.7) (**Fig. 5**). Plants were the  
329 primary diet item, with the largest fraction of rats consuming four predominant orders:  
330 *Poales* (grasses), *Fabales* (legumes), *Arecales* (palms), and *Araucariales* (podocarps).  
331 The dominance of plant matter (fruits and seeds) in rat diets has been established  
332 previously (Sweetapple and Nugent 2007; Riofrío-Lazo and Páez-Rosas 2015). Animal  
333 taxa made up a smaller component of each rat's diet, with *Insecta* dominating:  
334 *Hymenoptera*, *Coleoptera*, *Lepidoptera* (moths and butterflies), *Blattodea*  
335 (cockroaches), *Diptera* (flies), and *Phasmatodea* (stick insects). In addition

336 *Stylommatophora* (slugs and snails) were present in substantial numbers (**Fig. 6A** and  
337 **6B**). Fungi were only a small component, although several families and orders were  
338 present: *Sclerotiniaceae* (plant pathogens), *Saccharomycetaceae* (budding yeasts),  
339 *Mucorales* (pin molds), *Russulales* (brittle-gills and milk-caps), and *Chytriales* (black  
340 yeasts). Finally, for many rats, a substantial proportion of the stomach contents were  
341 parasitic worms (primarily *Spirurida* (nematodes) and *Hymenolepididae* (tapeworms)).

342 Close examination of this data suggested that specific families and orders were  
343 overrepresented in the diets of rats from particular locations. For example, six out of  
344 eight rats from the native estuarine bush habitat (OB) consumed *Arecaceae*, while only  
345 one in the restored wetland area (LB) did. All three rats that consumed *Phaseanidae*  
346 were from the native estuarine habitat (OB). All five rats that consumed *Solanales* were  
347 from the restored wetland area. These patterns suggested that it might be possible to  
348 use diet components alone to pinpoint the habitat from which each rat was sampled.

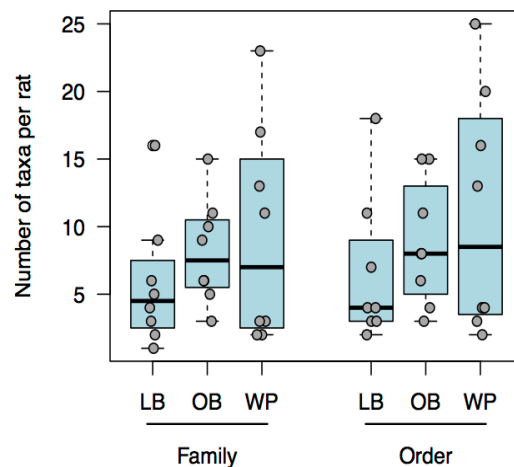

349

350 **Fig. 5. Numbers of taxa in individual rats.** Each boxplot indicates the range of  
351 families (left boxes) or orders (right boxes) consumed by each rat in each location (OB:  
352 Okura Bush; LB: Long Bay Park; WP: Waitakere Park). The numbers for individual rats  
353 (eight per location) are plotted in grey.

354



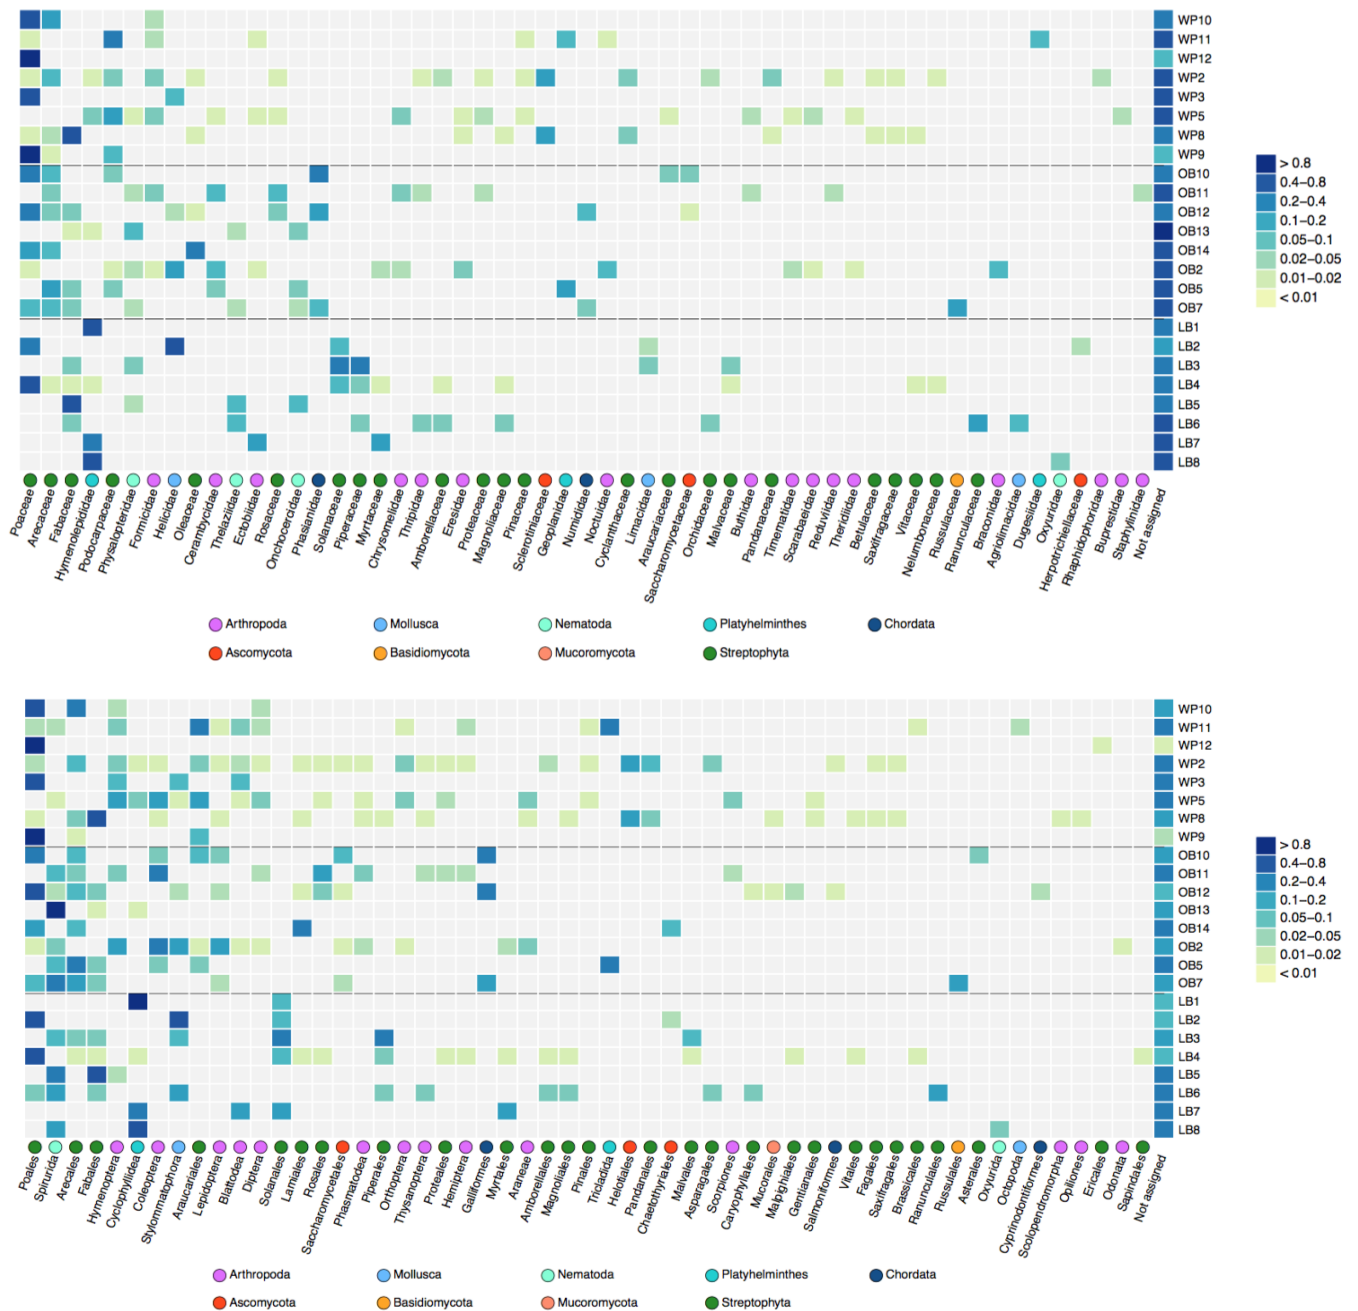

355 **Fig. 6. Proportions of taxa in the diets of individual rats.** Reads assigned to taxa at  
 356 the family and order level are shown in the top and bottom panels, respectively. Each  
 357 row corresponds to a single rat, with the proportions of reads for that rat assigned to  
 358 each family or order indicated in shades of blue and yellow. Reads that were not  
 359 assigned to a specific family or order are on the right end of the figure. The families and  
 360 orders have been sorted so that the most common diet components appear on the left.  
 361 Only the 55 most common families are shown. Note that the colour gradations  
 362 presented on the scale are not linear.

363 nMDS and CAP analysis by location

364 In order to determine if diet composition of the rats differed consistently between  
365 locations, we first performed an unconstrained analysis using nMDS on taxa assigned  
366 at the family level. Using family rather than order or genus provides a balance between  
367 how precisely we identify the taxon of diet item (genus, family, order), and whether we  
368 assign a taxon at all. While family-level assignments are less precise than genus-level,  
369 only 16% of all reads were classified at the genus level, while 71% were classified at the  
370 family level.

371 The family-level unconstrained ordination (nMDS; **Fig. 7a**) showed no obvious grouping  
372 of rats with respect to the locations, indicating that locations did not correspond to the  
373 predominant axes of variation among the diets. However, a constrained ordination  
374 analysis (CAP; **Fig. 7b**) identified axes of variation that distinguished the diets of rats  
375 from different locations. The CAP axes correctly classified the locations of 19 out of 24  
376 (79%) rats using a leave-one-out procedure.

377 The families that best characterised the three locations (i.e., had the greatest within-  
378 location SIMPER scores) varied among locations. WP had average Bray-Curtis within-  
379 location similarity of 13%; mostly attributable to *Hymenolepidae* (accounting for 51% of  
380 the within-group similarity), *Solanaceae* (11%), and *Fabaceae* (11%). The average  
381 similarity for OB was 21%, with the greatest contributing taxa being *Arecaceae* (33%),  
382 *Poaceae* (23%), *Fabaceae* (9%), and *Phasianidae* (8%). The average similarity for WP  
383 was 24%, with the greatest contributing taxa being *Poaceae* (72%) (**Table S4**). The  
384 families with the largest correlations with the first two principal coordinates and thus  
385 responsible for the separation between groups) were *Arecaceae*, *Podocarpaceae*,  
386 *Phasianidae*, and *Pinaceae* (**Fig. 7c**).

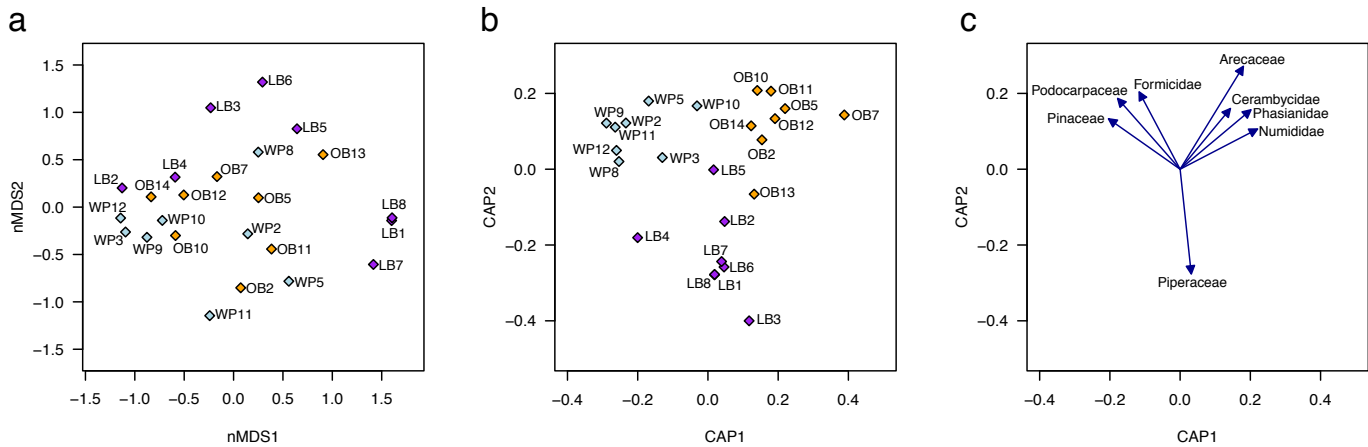

387 **Fig. 7. Unconstrained nMDS (a) and constrained CAP (b) ordinations of the diets**  
 388 **of rats from three locations. Both ordinations were based on Bray-Curtis**  
 389 **dissimilarities of square root transformed proportions of reads attributed to each**  
 390 **family.** The locations were a native estuarine bush (OB, orange); a restored marine  
 391 wetland (LB, purple); and a native forest (WP, light blue). The CAP ordination is  
 392 repeated in panel (c) with the rats omitted to show the **Pearson correlations**  
 393 **between families and the two cap axes.** The eight families with the strongest  
 394 correlations are shown, indicating the taxa most strongly associated with each location.

395

396 Discussion

397 Accuracy and sensitivity

398 Here we have shown that using a simple long-read metagenomic DNA sequencing  
 399 approach allows rapid classification of rat diet components. We expect that this  
 400 technique for dietary analysis could be applied to a variety of animals and sample types,  
 401 including samples that require less invasive collection (e.g. fecal matter). The sensitivity  
 402 of this approach will likely improve as the accuracy and yield of Oxford Nanopore  
 403 sequencing increases, and as the diversity of taxa in genomic sequence databases  
 404 increases. Several aspects of the data support this.

405 First, we note that we did not find BLAST hits for the majority of reads. This is partially  
406 due the relatively low accuracy of the Oxford Nanopore sequencing platform at the time  
407 we preformed this analysis (approximately 87%). However, the fraction of reads yielding  
408 hits in the database increased substantially for higher quality reads, approaching 40%  
409 for very high-quality reads (**Fig. 3b**). Other factors also likely reduced the numbers of  
410 BLAST hits, such as the paucity of genome sequence data for many taxa. This is  
411 convincingly illustrated by comparing across taxa the fraction of genomic hits to  
412 mitochondrial or rDNA sequence hits: although genome data exists for only a few taxa,  
413 mtDNA and rDNA sequence data are present in the database for the vast majority of  
414 animal and plant genera.

415 For animals with sequenced genomes in the database, we found that only a minority of  
416 reads mapped to mitochondrial or rDNA sequences (e.g. 32% of *Rattus* hits and 22% of  
417 *Anoplophora* hits). For plants with sequenced genomes, the fraction of mtDNA or rDNA-  
418 matching reads was even lower: between 4% (*Aegilops*) and 6% (*Triticum* and  
419 *Solanum*). For genera with little or no genomic sequence, the vast majority of matches  
420 were solely to mtDNA, rDNA, or microsatellite loci: 90% of *Phoenix* (date palm) hits; all  
421 *Helix* (snail) and *Rhaphidophora* (cave weta) hits. All *Artioposthia* (New Zealand  
422 flatworm) hits were to rDNA. These results indicate that for genera with no genomic  
423 sequence data, we have underestimated the actual number of sequences from that  
424 taxon by approximately three- to twenty-fold (for animals and plants, respectively).

425 As the species sampling of genomic databases increases (Lewin et al. 2018), the taxon-  
426 level precision of this method will improve. Given the current rate of genomic  
427 sequencing, with careful sampling, the vast majority of multicellular plant and animal  
428 families (and even genera) will likely have at least one type species with a sequenced  
429 genome within the next decade. Continued advancement in sequence database search  
430 algorithms as compared to current methods (Wood and Salzberg 2014; Kim et al. 2016;  
431 Nasko et al. 2018) should considerably decrease the computational workload necessary  
432 to find matching sequences.

433 To decrease biases in genomic databases, some previous studies have performed  
434 metagenomic classification using mitogenome data alone (Srivathsan et al. 2016; Paula  
435 et al. 2016). Using such methods, they found between 0.004% and 0.008% of all  
436 metagenomic reads matched mitogenomes from diet taxa. Limiting database searches  
437 to mitogenomes partially ameliorates biases in terms of taxon field in terms of taxon  
438 representation (i.e. most taxa will have similar levels of genomic representation in the  
439 databases). However, it considerably decreases diet resolution given that for some  
440 taxa, only a small percentage of sequence reads derive from the mitochondria as  
441 opposed to the nuclear genome.

442 It is important to note that our interest in diet also includes resolving relative biomass  
443 and relative numbers of each prey species, neither of which necessarily correlate well  
444 with the amount of DNA (either mitochondrial or nuclear) purified from a sample. Even a  
445 simple correction for the fraction of reads matching mitochondrial versus nuclear  
446 genomes is difficult, as different plant and animal tissues differ considerably in the  
447 relative amounts of mitochondrial versus nuclear DNA (e.g. leaf versus fruit).

#### 448 Methodological advantages

449 We found that rats consumed many soft-bodied species (e.g. mushrooms, flat worms,  
450 slugs, and lepidopterans) that would be difficult to identify using visual inspection of  
451 stomach contents. Capturing such a wide variety of taxa would be difficult to quantify  
452 using metabarcoding methods, as there are no universal 18S or COI universal primers  
453 capable of amplifying sequences in all these taxa. While it might be possible to use  
454 primer sets targeted at different phyla or orders, quantitatively comparing diet  
455 components across these using sequences amplified with different primer sets is  
456 extremely difficult due to differences in primer binding and PCR efficiency.

457 The nanopore MinION-based sequencing method used in this simple metagenomic  
458 approach has several advantages. Compared to other high throughput sequencing  
459 technologies (e.g. Illumina, IonTorrent, or PacBio), there is no initial capital investment

460 required to use the platform. On a per-sample basis, data generation is inexpensive  
461 (approximately \$150 USD per barcoded sample, and approximately half this price if  
462 reagents are purchased in bulk). Library preparation and sequencing can be extremely  
463 rapid, going from DNA sample to sequence in less than two hours (Zaaijer et al. 2017).  
464 Furthermore, the sequencing platform itself is highly portable. As the cost of nanopore-  
465 based sequencing continues to decrease (both per sample and per base pair), it should  
466 become possible to use molecular methods for routine ecological monitoring of species  
467 presence or absence in field settings, without significant investment in infrastructure  
468 (Kamenova et al. 2017). Finally, we suggest that our approach of standardising the read  
469 counts by sample, followed by an optional transformation such as square root and  
470 dissimilarity-based multivariate ordination, offers a useful analytical pipeline for  
471 analysing metagenomic diet-composition data.

## 472 Conclusion

473 Here we have shown that a rapid long-read metagenomic approach is able to accurately  
474 characterise diet taxa at the family-level and distinguish between the diets of rats  
475 according to the locations from which they were sourced, with almost 80% out-of-  
476 sample classification success. This approach also identifies the taxa responsible for  
477 such patterns. This information may be used to guide conservation efforts toward  
478 specific areas and habitats in which native species are most at risk from this highly  
479 destructive introduced predator.

480

481 Acknowledgements

482 This work was supported by a Massey University Research Fund to NF, a Marsden  
483 Fund Grant (15-MAU-136) to JD and Marsden Fund Grant (MAU1703) to OS. Thanks to  
484 Friends of Okura Bush, Mary Stewart from Auckland Council, and Gillian Wadams and  
485 the volunteers at the Waitakere Ranges for collecting rat samples. Sample collection  
486 was performed under (Auckland Council Permit to Undertake Research WS1064).

487

488 Data Accessibility

489 Sequence data are available in ENA (accession number PRJEB27647)

490 Author Contributions

491 WP, JD, NF, and OS conceived the project. WP performed the stomach dissections.

492 WP and NF optimised the genomic DNA isolation and library preparation. NF performed

493 the nanopore sequencing. GB and OS processed and performed quality control on the

494 sequencing data. WP and OS performed the sequence classification. WP, AS, NF, and

495 OS analysed the data. WP, NF, AS, and OS wrote the paper, with input from all authors.

496

497 Supplemental Tables

498 **Table S1.** Read numbers and total base pairs for each barcode in the January  
499 sequencing run.

| <b>Rat</b>   | <b>Total reads</b> | <b>Total Mbp</b> | <b>Mean length</b> |
|--------------|--------------------|------------------|--------------------|
| <b>OB2</b>   | 19,907             | 14.62            | 734                |
| <b>WP11</b>  | 10,164             | 9.63             | 947                |
| <b>WP5</b>   | 8237               | 6.78             | 823                |
| <b>LB7</b>   | 7548               | 7.04             | 933                |
| <b>OB13</b>  | 3644               | 3.63             | 995                |
| <b>WP9</b>   | 2954               | 2.4              | 814                |
| <b>OB5</b>   | 2850               | 2.06             | 721                |
| <b>WP8</b>   | 2801               | 2.32             | 827                |
| <b>LB6</b>   | 2531               | 1.6              | 632                |
| <b>OB7</b>   | 2473               | 1.87             | 756                |
| <b>LB5</b>   | 1641               | 1.16             | 705                |
| <b>LB3</b>   | 1554               | 0.99             | 636                |
| <b>None</b>  | 16673              | 13.01            | 781                |
| <b>Total</b> | 82,977             | 67.1             |                    |

500



501 **Table S2.** Read numbers and total base pairs for each barcode in the March  
502 sequencing run.

| <b>Barcode</b> | <b>Total</b> | <b>Total Mbp</b> | <b>Mean</b> |
|----------------|--------------|------------------|-------------|
| <b>LB1</b>     | 17,820       | 9.21             | 517         |
| <b>LB8</b>     | 16,923       | 13.13            | 776         |
| <b>WP2</b>     | 10,511       | 7.00             | 666         |
| <b>LB4</b>     | 8684         | 4.92             | 567         |
| <b>OB11</b>    | 5689         | 3.40             | 598         |
| <b>WP10</b>    | 1563         | 0.99             | 633         |
| <b>OB12</b>    | 1479         | 0.89             | 604         |
| <b>WP12</b>    | 1309         | 0.78             | 596         |
| <b>LB2</b>     | 1127         | 0.76             | 676         |
| <b>WP3</b>     | 637          | 0.73             | 1141        |
| <b>OB14</b>    | 541          | 0.37             | 683         |
| <b>OB10</b>    | 435          | 0.24             | 555         |
| <b>None</b>    | 29,432       | 21.33            | 725         |
| <b>Total</b>   | 96,150       | 63.75            |             |

503

504 **Table S3.** SIMPER analysis of family contributions to group similarities. Abbreviations:  
505 Av.Abund: average abundance; Av.Si: average similarity; Sim/SD: similarity over  
506 standard deviation; Percent.contr: percent contribution.

507

| <b>Family</b>         | <b>Av.Abun</b> | <b>Av.Si</b> | <b>Sim/SD</b> | <b>Percent.cont</b> | <b>Group</b> |
|-----------------------|----------------|--------------|---------------|---------------------|--------------|
| <b>Hymenolepidida</b> | 3.37           | 6.87         | 0.34          | 51.2                | LB           |
| <b>Solanaceae</b>     | 1.57           | 1.48         | 0.34          | 11.1                | LB           |
| <b>Fabaceae</b>       | 1.74           | 1.41         | 0.44          | 10.5                | LB           |
| <b>Areaceae</b>       | 2.86           | 7.11         | 1             | 33.4                | OB           |
| <b>Poaceae</b>        | 2.87           | 4.82         | 0.55          | 22.7                | OB           |
| <b>Fabaceae</b>       | 1.17           | 1.98         | 0.51          | 9.3                 | OB           |
| <b>Phasianidae</b>    | 1.79           | 1.67         | 0.34          | 7.9                 | OB           |
| <b>Poaceae</b>        | 5.08           | 17.61        | 0.62          | 72.1                | WP           |

508

509 **Table S4.** SIMPER analysis of family contributions to group dissimilarities. The families  
 510 are sorted by percent contribution to group dissimilarity. Abbreviations: Abund.Group1  
 511 and Abund.Group2: abundance of each family in groups 1 and 2 (see Group 1 and 2  
 512 columns). Av.Diss: average dissimilarity; Diss/SD: Dissimilarity over standard deviation;  
 513 Percent.contr: percent contribution.

| Family          | Abund.Group1 | Abund.Group2 | Av.Diss | Diss/SD | Percent.contr | Group1 | Group2 |
|-----------------|--------------|--------------|---------|---------|---------------|--------|--------|
| Poaceae         | 1.95         | 5.08         | 15.15   | 1.04    | 16.74         | LB     | WP     |
| Poaceae         | 2.87         | 5.08         | 11.29   | 1.26    | 13.78         | OB     | WP     |
| Hymenolepididae | 3.37         | 0.48         | 10.8    | 0.73    | 11.93         | LB     | WP     |
| Hymenolepididae | 3.37         | 0.29         | 9.37    | 0.79    | 10.32         | LB     | OB     |
| Poaceae         | 1.95         | 2.87         | 8.37    | 1.1     | 9.22          | LB     | OB     |
| Arecaceae       | 0.05         | 2.86         | 6.99    | 1.41    | 7.7           | LB     | OB     |
| Arecaceae       | 2.86         | 1.31         | 5.92    | 1.29    | 7.23          | OB     | WP     |
| Fabaceae        | 1.74         | 1.05         | 6.14    | 0.67    | 6.78          | LB     | WP     |
| Podocarpaceae   | 0            | 2.38         | 5.34    | 0.83    | 5.9           | LB     | WP     |
| Podocarpaceae   | 0.71         | 2.38         | 4.82    | 0.99    | 5.88          | OB     | WP     |
| Fabaceae        | 1.74         | 1.17         | 4.87    | 0.81    | 5.37          | LB     | OB     |
| Fabaceae        | 1.17         | 1.05         | 4.31    | 0.84    | 5.26          | OB     | WP     |
| Phasianidae     | 1.79         | 0            | 4.03    | 0.7     | 4.92          | OB     | WP     |
| Phasianidae     | 0            | 1.79         | 4.28    | 0.72    | 4.71          | LB     | OB     |
| Physalopteridae | 1.63         | 0.18         | 3.79    | 0.59    | 4.63          | OB     | WP     |
| Physalopteridae | 0.46         | 1.63         | 4.15    | 0.65    | 4.57          | LB     | OB     |
| Solanaceae      | 1.57         | 0            | 3.95    | 0.65    | 4.37          | LB     | WP     |
| Solanaceae      | 1.57         | 0            | 3.56    | 0.67    | 3.92          | LB     | OB     |
| Helicidae       | 0.87         | 0.47         | 3.46    | 0.52    | 3.82          | LB     | WP     |
| Oleaceae        | 1.06         | 0.25         | 3.09    | 0.44    | 3.77          | OB     | WP     |
| Arecaceae       | 0.05         | 1.31         | 3.4     | 0.65    | 3.75          | LB     | WP     |
| Piperaceae      | 1.42         | 0            | 3.36    | 0.65    | 3.71          | LB     | WP     |
| Helicidae       | 0.87         | 0.82         | 3.33    | 0.58    | 3.66          | LB     | OB     |
| Cerambycidae    | 1.41         | 0.18         | 2.99    | 0.77    | 3.65          | OB     | WP     |
| Cerambycidae    | 0            | 1.41         | 3.07    | 0.74    | 3.38          | LB     | OB     |
| Oleaceae        | 0            | 1.06         | 3.06    | 0.41    | 3.37          | LB     | OB     |
| Piperaceae      | 1.42         | 0            | 3.04    | 0.67    | 3.35          | LB     | OB     |
| Onchocercidae   | 0.39         | 1.04         | 3.02    | 0.77    | 3.33          | LB     | OB     |
| Geoplanidae     | 0.8          | 0.48         | 2.64    | 0.49    | 3.22          | OB     | WP     |
| Thelaziidae     | 0.9          | 0.64         | 2.85    | 0.77    | 3.14          | LB     | OB     |
| Helicidae       | 0.82         | 0.47         | 2.54    | 0.61    | 3.1           | OB     | WP     |
| Onchocercidae   | 1.04         | 0            | 2.49    | 0.66    | 3.04          | OB     | WP     |
| Formicidae      | 0.44         | 1.17         | 2.39    | 1.04    | 2.92          | OB     | WP     |

|                 |      |      |      |      |      |    |    |
|-----------------|------|------|------|------|------|----|----|
| Sclerotiniaceae | 0    | 1.28 | 2.63 | 0.57 | 2.91 | LB | WP |
| Sclerotiniaceae | 0    | 1.28 | 2.3  | 0.57 | 2.81 | OB | WP |
| Formicidae      | 0    | 1.17 | 2.46 | 0.94 | 2.72 | LB | WP |
| Rosaceae        | 0.92 | 0.3  | 2.13 | 0.58 | 2.61 | OB | WP |
| Ectobiidae      | 0.63 | 0.34 | 2.24 | 0.5  | 2.48 | LB | WP |
| Thelaziidae     | 0.9  | 0    | 2.13 | 0.56 | 2.36 | LB | WP |
| Geoplanidae     | 0    | 0.8  | 2.04 | 0.37 | 2.25 | LB | OB |
| Rosaceae        | 0    | 0.92 | 1.99 | 0.5  | 2.19 | LB | OB |
| Numididae       | 0.78 | 0    | 1.68 | 0.56 | 2.05 | OB | WP |
| Myrtaceae       | 0.66 | 0    | 1.8  | 0.38 | 1.99 | LB | WP |
| Thelaziidae     | 0.64 | 0    | 1.53 | 0.51 | 1.86 | OB | WP |
| Ranunculaceae   | 0.66 | 0    | 1.36 | 0.37 | 1.5  | LB | WP |

514

515 **Datafile S1.** Table of read BLAST hits and assigned MEGAN taxa with reads  
516 reclassified at the family or order level by filtering on read length to alignment length  
517 ratio and percent identity.

518 **Datafile S2.** Table of read BLAST hits and assigned MEGAN taxa with no filters  
519 applied.

520

521 Supplemental Figures

522 **Fig S1. Biplots of read lengths and qualities for each barcode in the January and**  
523 **March runs.**

524

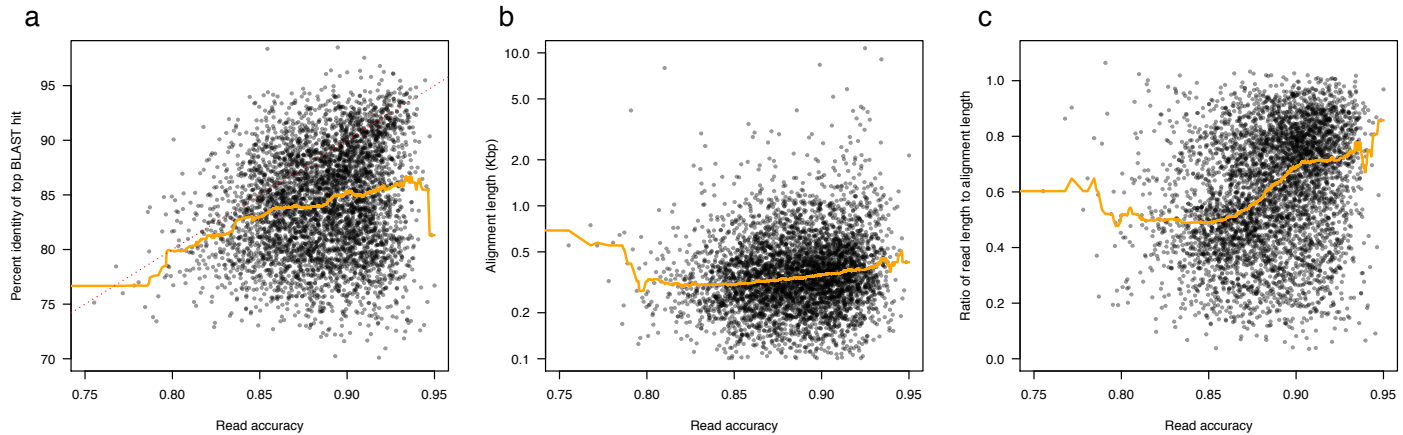

525 **Fig S2. Correlation of read accuracy with alignment characteristics. (a)** Read  
526 accuracy is positively correlated with the percent identity of the top BLAST hit. Points  
527 show a subsample of reads; orange line indicates a running median; red dotted line is  
528 the  $y=x$  line, which is expected if accuracy corresponds exactly to percent identity. **(b)**  
529 Read accuracy and alignment length show no relationship. **(c)** Read accuracy and the  
530 ratio of read length to alignment length are positively correlated.

531

## 532 References

- 533 1. Anderson, Marti J., and Trevor J. Willis. 2003. "Canonical Analysis Of Principal  
534 Coordinates: A Useful Method Of Constrained Ordination For Ecology." *Ecology*  
535 84 (2): 511–25.
- 536
- 537 2. Basha, Walaa A., Andrew T. Chamberlain, Moushira E. Zaki, Wafaa A. Kandeel,  
538 and Nagui H. Fares. 2016. "Diet Reconstruction through Stable Isotope Analysis  
539 of Ancient Mummified Soft Tissues from Kulubnarti (Sudanese Nubia)." *Journal*  
540 *of Archaeological Science: Reports* 5 (February): 71–79.
- 541
- 542 3. Bridgman, L. J., J. Innes, Craig Gillies, Neil Fitzgerald, and Carolyn M. King.  
543 2013. "Do Ship Rats Display Predatory Behaviour towards House Mice?" *Animal*  
544 *Behaviour* 86 (2): 257–68.
- 545
- 546 4. Brown, K. P., H. Moller, J. Innes, and P. Jansen. 2008. "Identifying Predators at  
547 Nests of Small Birds in a New Zealand Forest." *The Ibis* 140 (2): 274–79.
- 548
- 549 5. Brownlee, A., and W. Moss. 1961. "The Influence of Diet on Lactobacilli in the  
550 Stomach of the Rat." *The Journal of Pathology* 82 (2): 513–16.
- 551
- 552 6. Carreon-Martinez, L., and D. D. Heath. 2010. "Revolution in Food Web Analysis

- 553 and Trophic Ecology: Diet Analysis by DNA and Stable Isotope Analysis.”  
554 *Molecular Ecology* 19 (1): 25–27.
- 555
- 556 7. Clarke, K. R. 1993. “Non-Parametric Multivariate Analyses of Changes in  
557 Community Structure.” *Austral Ecology* 18 (1): 117–43.
- 558
- 559 8. Clarke, K. R., and R. N. Gorley. 2015. “PRIMER v7: User Manual/Tutorial.”  
560 PRIMER-E, Plymouth.
- 561
- 562 9. Clarke, K. R., and R. H. Green. 1988. “Statistical Design and Analysis for a  
563 ‘Biological Effects’ Study.” *Marine Ecology Progress Series* 46: 213–26.
- 564
- 565 10. Clarke, K. Robert, K. Robert Clarke, Paul J. Somerfield, and M. Gee Chapman.  
566 2006. “On Resemblance Measures for Ecological Studies, Including Taxonomic  
567 Dissimilarities and a Zero-Adjusted Bray–Curtis Coefficient for Denuded  
568 Assemblages.” *Journal of Experimental Marine Biology and Ecology* 330 (1): 55–  
569 80.
- 570
- 571 11. Daniel, M. J. 1973. “Seasonal Diet Of The Ship Rat (*Rattus Rattus*) In Lowland  
572 Forest In New Zealand.” *Proceedings of the New Zealand Ecological Society* 20:  
573 21–30.
- 574
- 575 12. Deagle, Bruce E., J. Paige Eveson, and Simon N. Jarman. 2006. “Quantification  
576 of Damage in DNA Recovered from Highly Degraded Samples--a Case Study on  
577 DNA in Faeces.” *Frontiers in Zoology* 3 (August): 11.
- 578
- 579 13. Deagle, Bruce E., Simon N. Jarman, Eric Coissac, François Pompanon, and  
580 Pierre Taberlet. 2014. “DNA Metabarcoding and the Cytochrome c Oxidase  
581 Subunit I Marker: Not a Perfect Match.” *Biology Letters* 10 (9).  
582 <https://doi.org/10.1098/rsbl.2014.0562>.
- 583
- 584 14. Diamond, J. M., and C. R. Veitch. 1981. “Extinctions and Introductions in the  
585 New Zealand Avifauna: Cause and Effect?” *Science* 211 (4481): 499–501.
- 586
- 587 15. Dowding, John E., and Elaine C. Murphy. 2001. “The Impact of Predation by  
588 Introduced Mammals on Endemic Shorebirds in New Zealand: A Conservation  
589 Perspective.” *Biological Conservation* 99 (1): 47–64.
- 590
- 591 16. Dunlap, M., and J. R. Pawlik. 1996. “Video-Monitored Predation by Caribbean  
592 Reef Fishes on an Array of Mangrove and Reef Sponges.” *Marine Biology* 126  
593 (1): 117–23.
- 594
- 595 17. Gibbs, George W. 1998. “Why Are Some Weta (Orthoptera: Stenopelmatidae)  
596 Vulnerable yet Others Are Common?” *Journal of Insect Conservation* 2 (3-4):

- 597 161–66.  
598
- 599 18. Gillies, Craig, and Mick Clout. 2003. “The Prey of Domestic Cats (*Felis Catus*) in  
600 Two Suburbs of Auckland City, New Zealand.” *Journal of Zoology* 259 (3): 309–  
601 15.  
602
- 603 19. Hobson, Keith A. 1987. “Use of Stable-Carbon Isotope Analysis to Estimate  
604 Marine and Terrestrial Protein Content in Gull Diets.” *Canadian Journal of*  
605 *Zoology* 65 (5): 1210–13.  
606
- 607 20. Horáková, Z., C. H. Zierdt, and M. A. Beaven. 1971. “Identification of  
608 *Lactobacillus* as the Source of Bacterial Histidine Decarboxylase in Rat  
609 Stomach.” *European Journal of Pharmacology* 16 (1): 67–77.  
610
- 611 21. Huson, Daniel H., Alexander F. Auch, Ji Qi, and Stephan C. Schuster. 2007.  
612 “MEGAN Analysis of Metagenomic Data.” *Genome Research* 17 (3): 377–86.  
613
- 614 22. Huson, Daniel H., Sina Beier, Isabell Flade, Anna Górska, Mohamed El-Hadidi,  
615 Suparna Mitra, Hans-Joachim Ruscheweyh, and Rewati Tappu. 2016. “MEGAN  
616 Community Edition - Interactive Exploration and Analysis of Large-Scale  
617 Microbiome Sequencing Data.” *PLoS Computational Biology* 12 (6): e1004957.  
618
- 619 23. Jain, Miten, Hugh E. Olsen, Benedict Paten, and Mark Akeson. 2016. “The  
620 Oxford Nanopore MinION: Delivery of Nanopore Sequencing to the Genomics  
621 Community.” *Genome Biology* 17 (1): 239.  
622
- 623 24. Jarman, S. N., B. E. Deagle, and N. J. Gales. 2004. “Group-Specific Polymerase  
624 Chain Reaction for DNA-Based Analysis of Species Diversity and Identity in  
625 Dietary Samples.” *Molecular Ecology* 13 (5): 1313–22.  
626
- 627 25. Jarman, S. N., N. J. Gales, M. Tierney, P. C. Gill, and N. G. Elliott. 2002. “A  
628 DNA-Based Method for Identification of Krill Species and Its Application to  
629 Analysing the Diet of Marine Vertebrate Predators.” *Molecular Ecology* 11 (12):  
630 2679–90.  
631
- 632 26. Kamenova, S., T. J. Bartley, D. A. Bohan, J. R. Boutain, R. I. Colautti, I.  
633 Domaizon, C. Fontaine, et al. 2017. “Chapter Three - Invasions Toolkit: Current  
634 Methods for Tracking the Spread and Impact of Invasive Species.” In *Advances*  
635 *in Ecological Research*, edited by David A. Bohan, Alex J. Dumbrell, and  
636 François Massol, 56:85–182. Academic Press.  
637
- 638 27. Kim, Daehwan, Li Song, Florian P. Breitwieser, and Steven L. Salzberg. 2016.  
639 “Centrifuge: Rapid and Sensitive Classification of Metagenomic Sequences.”  
640 *Genome Research* 26 (12): 1721–29.

- 641  
642 28. King, R. A., D. S. Read, M. Traugott, and W. O. C. Symondson. 2008. "Molecular  
643 Analysis of Predation: A Review of Best Practice for DNA-Based Approaches."  
644 *Molecular Ecology* 17 (4): 947–63.  
645
- 646 29. Leray, Matthieu, Joy Y. Yang, Christopher P. Meyer, Suzanne C. Mills, Natalia  
647 Agudelo, Vincent Ranwez, Joel T. Boehm, and Ryuji J. Machida. 2013. "A New  
648 Versatile Primer Set Targeting a Short Fragment of the Mitochondrial COI Region  
649 for Metabarcoding Metazoan Diversity: Application for Characterizing Coral Reef  
650 Fish Gut Contents." *Frontiers in Zoology* 10 (June): 34.  
651
- 652 30. Lewin, Harris A., Gene E. Robinson, W. John Kress, William J. Baker, Jonathan  
653 Coddington, Keith A. Crandall, Richard Durbin, et al. 2018. "Earth BioGenome  
654 Project: Sequencing Life for the Future of Life." *Proceedings of the National  
655 Academy of Sciences of the United States of America* 115 (17): 4325–33.  
656
- 657 31. Li, Dongyao, Haiqin Chen, Bingyong Mao, Qin Yang, Jianxin Zhao, Zhennan Gu,  
658 Hao Zhang, Yong Q. Chen, and Wei Chen. 2017. "Microbial Biogeography and  
659 Core Microbiota of the Rat Digestive Tract." *Scientific Reports* 8 (April): 45840.  
660
- 661 32. Major, H. L., I. L. Jones, M. R. Charette, and A. W. Diamond. 2007. "Variations in  
662 the Diet of Introduced Norway Rats (*Rattus norvegicus*) Inferred Using Stable  
663 Isotope Analysis." *Journal of Zoology* 271 (4): 463–68.  
664
- 665 33. Maurice, Corinne F., Sarah C. L. Knowles, Joshua Ladau, Katherine S. Pollard,  
666 Andy Fenton, Amy B. Pedersen, and Peter J. Turnbaugh. 2015. "Marked  
667 Seasonal Variation in the Wild Mouse Gut Microbiota." *The ISME Journal* 9 (11):  
668 2423–34.  
669
- 670 34. McIntyre, Alexa B. R., Rachid Ounit, Ebrahim Afshinnekoo, Robert J. Prill,  
671 Elizabeth Hénaff, Noah Alexander, Samuel S. Minot, et al. 2017.  
672 "Comprehensive Benchmarking and Ensemble Approaches for Metagenomic  
673 Classifiers." *Genome Biology* 18 (1): 182.  
674
- 675 35. Nasko, Daniel J., Sergey Koren, Adam M. Phillippy, and Todd J. Treangen. 2018.  
676 "RefSeq Database Growth Influences the Accuracy of K-Mer-Based Species  
677 Identification," 1–21.  
678
- 679 36. Paula, Débora P., Benjamin Linard, David A. Andow, Edison R. Sujii, Carmen S.  
680 S. Pires, and Alfried P. Vogler. 2015. "Detection and Decay Rates of Prey and  
681 Prey Symbionts in the Gut of a Predator through Metagenomics." *Molecular  
682 Ecology Resources* 15 (4): 880–92.  
683
- 684 37. Paula, Débora P., Benjamin Linard, Alex Crampton-Platt, Amrita Srivathsan,



- 685 Martijn J. T. N. Timmermans, Edison R. Sujii, Carmen S. S. Pires, Lucas M.  
686 Souza, David A. Andow, and Alfried P. Vogler. 2016. "Uncovering Trophic  
687 Interactions in Arthropod Predators through DNA Shotgun-Sequencing of Gut  
688 Contents." *PloS One* 11 (9): e0161841.  
689
- 690 38. Pawluczyk, Marta, Julia Weiss, Matthew G. Links, Mikel Egaña Aranguren, Mark  
691 D. Wilkinson, and Marcos Egea-Cortines. 2015. "Quantitative Evaluation of Bias  
692 in PCR Amplification and next-Generation Sequencing Derived from  
693 Metabarcoding Samples." *Analytical and Bioanalytical Chemistry* 407 (7): 1841–  
694 48.  
695
- 696 39. Kerry P. Brown. 1997. "Predation at Nests of Two New Zealand Endemic  
697 Passerines; Implications for Bird Community Restoration." *Pacific Conservation  
698 Biology: A Journal Devoted to Conservation and Land Management in the Pacific  
699 Region* 3 (2): 91.  
700
- 701 40. Pereira, Rui P. A., Jorg Peplies, Ingrid Brettar, and Manfred G. Hoefle. 2018.  
702 "Impact of DNA Polymerase Choice on Assessment of Bacterial Communities by  
703 a *Legionella* Genus-Specific next-Generation Sequencing Approach." *bioRxiv*.  
704 <https://doi.org/10.1101/247445>.  
705
- 706 41. Pierce, Graham J., and Peter R. Boyle. 1991. "A Review of Methods for Diet  
707 Analysis in Piscivorous Marine Mammals." *Oceanography and Marine Biology:  
708 An Annual Review* 29: 409–86.  
709
- 710 42. Riofrío-Lazo, Marjorie, and Diego Páez-Rosas. 2015. "Feeding Habits of  
711 Introduced Black Rats, *Rattus rattus*, in Nesting Colonies of Galapagos Petrel on  
712 San Cristóbal Island, Galapagos." *PloS One* 10 (5): e0127901.  
713
- 714 43. Russell, James C., John G. Innes, Philip H. Brown, and Andrea E. Byrom. 2015.  
715 "Predator-Free New Zealand: Conservation Country." *Bioscience* 65 (5): 520–25.  
716
- 717 44. Soininen, Eeva M., Alice Valentini, Eric Coissac, Christian Miquel, Ludovic Gielly,  
718 Christian Brochmann, Anne K. Brysting, et al. 2009. "Analysing Diet of Small  
719 Herbivores: The Efficiency of DNA Barcoding Coupled with High-Throughput  
720 Pyrosequencing for Deciphering the Composition of Complex Plant Mixtures."  
721 *Frontiers in Zoology* 6 (August): 16.  
722
- 723 45. Srivathsan, Amrita, Andie Ang, Alfried P. Vogler, and Rudolf Meier. 2016. "Fecal  
724 Metagenomics for the Simultaneous Assessment of Diet, Parasites, and  
725 Population Genetics of an Understudied Primate." *Frontiers in Zoology* 13 (April):  
726 17.  
727
- 728 46. Srivathsan, Amrita, John C. M. Sha, Alfried P. Vogler, and Rudolf Meier. 2015.

- 729 “Comparing the Effectiveness of Metagenomics and Metabarcoding for Diet  
730 Analysis of a Leaf-Feeding Monkey (*Pygathrix Nemaeus*).” *Molecular Ecology*  
731 *Resources* 15 (2): 250–61.  
732
- 733 47. Stringer, Ian A. N., Suzanne M. Bassett, Megan J. McLean, Jay McCartney, and  
734 G. Richard Parrish. 2003. “Biology and Conservation of the Rare New Zealand  
735 Land Snail *Paryphanta Busbyi Watti* (Mollusca, Pulmonata).” *Invertebrate*  
736 *Biology: A Quarterly Journal of the American Microscopical Society and the*  
737 *Division of Invertebrate Zoology/ASZ* 122 (3): 241–51.  
738
- 739 48. Sweetapple, Peter J., and Graham Nugent. 2007. “Ship Rat Demography and  
740 Diet Following Possum Control in a Mixed Podocarp—hardwood Forest.” *New*  
741 *Zealand Journal of Ecology* 31 (2): 186–201.  
742
- 743 49. Tedersoo, Leho, Sten Anslan, Mohammad Bahram, Sergei Põlme, Taavi Riit,  
744 Ingrid Liiv, Urmas Kõljalg, et al. 2015. “Shotgun Metagenomes and Multiple  
745 Primer Pair-Barcode Combinations of Amplicons Reveal Biases in  
746 Metabarcoding Analyses of Fungi.” *MycKeys* 10: 1.  
747
- 748 50. Towns, David R., Charles H. Daugherty, and Alison Cree. 2001. “Raising the  
749 Prospects for a Forgotten Fauna: A Review of 10 Years of Conservation Effort for  
750 New Zealand Reptiles.” *Biological Conservation* 99 (1): 3–16.  
751
- 752 51. Wood, Derrick E., and Steven L. Salzberg. 2014. “Kraken: Ultrafast Metagenomic  
753 Sequence Classification Using Exact Alignments.” *Genome Biology* 15 (3): R46.  
754
- 755 52. Zaaijer, Sophie, Assaf Gordon, Daniel Speyer, Robert Piccone, Simon Cornelis  
756 Groen, and Yaniv Erlich. 2017. “Rapid Re-Identification of Human Samples Using  
757 Portable DNA Sequencing.” *eLife* 6 (November).  
758 <https://doi.org/10.7554/eLife.27798>.
