- 1 1. Title: New tools for diet analysis: nanopore sequencing of metagenomic DNA from rat
- 2 stomach contents to quantify diet
- 3 2. Authors: William S. Pearman, Adam N. H. Smith, Georgia Breckell, James Dale, Nikki
- 4 E. Freed, Olin K. Silander
- 5 3. Addresses of all authors: Institute of Natural and Mathematical Sciences, Massey
- 6 University, Auckland 0745, New Zealand
- 7 4. Keywords: Metagenomics, nanopore sequencing, diet analysis, rat, minion
- 8 5. Communicating authors: Olin K. Silander, Institute of Natural and Mathematical
- 9 Sciences, Massey University, Auckland 0745, New Zealand, [olinsilander@gmail.com](mailto:olinsilander@gmail.com),
- 10 +64 9 213 6618; Nikki E. Freed, Institute of Natural and Mathematical Sciences, Massey
- 11 University, Auckland 0745, New Zealand, [freednikki@gmail.com](mailto:freednikki@gmail.com), +64 9 213 6639
- 12 6. Running title: Quantifying rat diets by nanopore sequencing

13

## 14 Abstract

15 Using metagenomics to determine animal diet offers a new and promising alternative to  
16 current methods. Here we show that rapid and inexpensive diet quantification is  
17 possible through metagenomic sequencing with the portable Oxford Nanopore MinION.  
18 Using a simple amplification-free approach, we profiled the stomach contents from wild-  
19 caught rats. We conservatively identified diet items from over 50 taxonomic orders,  
20 ranging across nine phyla that include plants, vertebrates, invertebrates, and fungi. This  
21 highlights the wide range of taxa that can be identified using this simple approach. We  
22 calibrate the accuracy of this method by comparing the characteristics of reads  
23 matching the ground-truth host genome (rat) to those matching diet items. We also  
24 suggest a means to correct for biases in metagenomic approaches that arise due to the  
25 paucity of genomic sequence in databases as compared to mitochondrial DNA or  
26 rDNA. Finally, we implement a constrained ordination analysis to show that it is possible  
27 to identify the sampling location of an individual rat within tens of kilometres based on  
28 diet content alone. This work establishes long-read metagenomic methods as a  
29 straightforward and robust approach for diet quantification. It considerably simplifies the  
30 workflow and avoids many inherent biases as compared to metabarcoding. Continued  
31 increases in the accuracy and throughput of Nanopore sequencing, along with improved  
32 genomic databases, means that this approach will continue to improve in accuracy.

## 33 Introduction

### 34 Bias in current methods

35 Accurate information about what organisms are eating informs many aspects of our  
36 understanding of ecosystems and food web dynamics, however unbiased and sensitive  
37 assessment of diet content is extremely difficult to achieve due to the limited accuracy  
38 of available methods. A variety of methods have been applied to quantify diet  
39 components in animals, including visual inspection of gut contents (Daniel, 1973; Pierce  
40 & Boyle, 1991) stable isotope analysis (Carreon-Martinez & Heath, 2010; Major, Jones,  
41 Charette, & Diamond, 2007), and time-lapse video (Brown, Moller, Innes, & Jansen,  
42 2008; Dunlap & Pawlik, 1996). However, these methods can be biased and imprecise.  
43 Identification of prey items using visual examination of stomach contents is strongly  
44 affected by which items are most easily degraded (for example, soft-bodied species).  
45 Stable isotope analysis yields only broad information on diet such as relative  
46 consumption of protein and plant matter, as well as information on whether prey items  
47 are terrestrial or marine in origin (Basha, Chamberlain, Zaki, Kandeel, & Fares, 2016;  
48 Hobson, 1987). Time-lapse video (Dunlap & Pawlik, 1996; Volpov et al., 2015) requires  
49 identification of the specific prey item, often difficult or impossible for small prey items  
50 or in low-light conditions. To circumvent these issues, DNA-based methods (King,  
51 Read, Traugott, & Symondson, 2008; Soininen et al., 2009) are becoming more popular.  
52 Perhaps the most widely applied DNA-based method is metabarcoding. This approach  
53 relies on PCR amplification and sequencing of conserved regions from nuclear,

54 mitochondrial, or plastid genomes (King et al., 2008). With adequate primer selection,  
55 this method can detect a wide range of species, and does not require specific expertise  
56 necessary for other methods (for example identifying degraded prey items).

57 However, DNA metabarcoding is not free from bias. PCR primers must be specifically  
58 tailored to particular sets of taxa or species (Jarman, Gales, Tierney, Gill, & Elliott,  
59 2002). Although more “universal” PCR primer pairs have been developed (for example  
60 targeting all bilaterians or even all eukaryotes; (Jarman, Deagle, & Gales, 2004), all  
61 primer sets exhibit bias towards certain taxa. Tedersoo et al. (2015) (Tedersoo et al.,  
62 2015) found five-fold differences in fungal operational taxonomic units (OTU) estimates  
63 when using different sets of fungal-specific PCR primer pairs. Leray et al. (2013) (Leray  
64 et al., 2013) found that published universal primer pairs (i.e. those that do not target  
65 specific taxa) were capable of amplifying only between 57% and 91% of tested  
66 metazoan species, with as few as 33% of species in some phyla being amplified at all  
67 (e.g. cnidarians). Deagle et al. (2014) argued that in general, COI regions are simply not  
68 sufficiently conserved, and thus should not be used for metabarcoding studies at all  
69 (Deagle, Jarman, Coissac, Pompanon, & Taberlet, 2014). Finally, Pawluczyk et al. (2015)  
70 showed that different loci from the same species exhibit up to 2,000-fold differences in  
71 qPCR-estimated DNA quantity within samples (Pawluczyk et al., 2015). It has even  
72 been shown that the polymerase itself can bias diversity metrics when using  
73 metabarcoding methods (Pereira, Peplies, Brettar, & Hoefle, 2018). For these reasons, a  
74 less biased method is desirable.

## 75 Metagenomic sequencing for diet

76 Metagenomic sequencing, in which all of the DNA in the sample is directly sequenced,  
77 offers an attractive alternative to metabarcoding for several reasons. Metagenomic  
78 approaches have most frequently been used to yield insights into microbial diversity  
79 and function (Anantharaman et al., 2016; Fierer et al., 2012; Hover et al., 2018; Xu &  
80 Knight, 2015). Recent advances in computational methods (Breitwieser & Salzberg,  
81 2018; Huson, Mitra, Ruscheweyh, Weber, & Schuster, 2011; Kim, Song, Breitwieser, &  
82 Salzberg, 2016; Wood & Salzberg, 2014) now allow routine rapid quantification of  
83 microbial taxa in metagenomic samples. However, metagenomic approaches have  
84 rarely been used to quantify eukaryotic taxa. An important application of such a method  
85 would be for diet analysis, as many diet items are difficult to identify based on macro-  
86 or microscopic analysis.

87 Here, we quantify rat diet composition using a novel metagenomic approach based on  
88 long-read nanopore sequencing (Oxford Nanopore Technologies). This study shows for  
89 the first time that low-accuracy long-read sequences can be used to accurately classify  
90 eukaryotic metagenomic data. As a test case, we quantify rat diet using stomach  
91 contents. Using such samples is opportune for both methodological and ecological  
92 reasons.

93 First, rats are extremely omnivorous. As such, they serve as an excellent means to  
94 quantify the breadth of taxa that can be detected using a metagenomic long read  
95 approach. Second, the use of stomach samples means that a significant number of

96 reads will be host reads. This allows us to assess the characteristics of true positive  
97 sequence reads (rat-derived reads that match rat database sequences), as well as false  
98 negative and false positive reads (rat-derived reads that match non-rat database  
99 sequences). We can then determine whether reads matching diet items have similar  
100 characteristics to known true positive (host) reads.

101 Finally, understanding rat diets has important ecological implications. It is well-  
102 established that the relatively recent introduction of mammalian predators to New  
103 Zealand and other islands has had significant negative effects on many of the native  
104 animal populations. This ranges from insects (Gibbs, 1998), to reptiles (Towns,  
105 Daugherty, & Cree, 2001), to molluscs (Stringer, Bassett, McLean, McCartney, &  
106 Parrish, 2003), to birds (Diamond & Veitch, 1981; Dowding & Murphy, 2001), and can  
107 have detrimental effects for entire terrestrial and aquatic ecosystems (Graham et al.,  
108 2018). Currently, an ambitious plan is being put into place that aims for the eradication  
109 of all mammalian predators from New Zealand (including possums, rats, stoats, and  
110 hedgehogs), by 2050 (<http://www.doc.govt.nz/predator-free-2050>; (Russell, Innes,  
111 Brown, & Byrom, 2015). A useful step toward this goal would be to prioritise the  
112 management of predators, and establish in which locations native species experience  
113 the highest levels of predation. To do so requires establishing the diet content of local  
114 mammalian predators.

## 115 Materials and Methods

### 116 Study Areas

117 We trapped rats from three locations near Auckland, New Zealand. Each location  
118 comprised a different type of habitat: undisturbed inland native forest (Waitakere  
119 Regional Parklands, WP); native bush surrounding an estuary (Okura Bush Walkway,  
120 OB); and restored coastal wetland (Long Bay Regional Park, LB) (**Fig. 1**). Traps in OB  
121 and LB were baited with peanut butter, apple, and cinnamon wax pellets; or bacon fat  
122 and flax pellets. Traps in WP were baited with chicken eggs, rabbit meat, or cinnamon  
123 scented poison pellets. From 16 November to 16 December 2016, traps were surveyed  
124 by established conservation groups at each site every 48 hours. A total of 36 rats were  
125 collected from these locations. The majority of rats collected (34/36) were determined to  
126 be male *Rattus rattus* by visual inspection. These 34 rats were selected for further  
127 analysis.

128

### 129 DNA Isolation

130 Within 48 hours of trapping, rats were stored at either -20°C or -80°C until dissection.  
131 We removed intact stomachs from each animal and removed the contents. After snap  
132 freezing in liquid nitrogen, we homogenised the stomach contents using a sterile mini  
133 blender to ensure sampling was representative of the entire stomach.  
134 We purified DNA from 10-20 mg of homogenised stomach contents using the Promega  
135 Wizard Genomic DNA Purification Kit, with the following modifications to the Animal

136 Tissue protocol: after protein precipitation, we transferred the supernatant to a new tube  
137 and centrifuged a second time to minimise protein carryover. The DNA pellet was  
138 washed twice with ethanol. These modifications were performed to improved DNA  
139 purity. We rehydrated precipitated DNA by incubating overnight in molecular biology  
140 grade water at 4°C, and stored the DNA at -20°C. DNA quantity, purity, and quality was  
141 ascertained by nanodrop and agarose gel electrophoresis. The DNA samples were  
142 ranked according quantity and purity (based on A260/A280 and secondarily, A230/A280  
143 ratios). The eight highest quality DNA samples from each of the three locations were  
144 selected for DNA sequencing.

## 145 DNA Sequencing

146 Sequencing was performed on two different dates (24 January 2017 and 17 March  
147 2017) using a MinION Mk1B device and R9.4 chemistry. For each sequencing run, DNA  
148 from each rat was barcoded using the 1D Native Barcoding Kit (Barcode expansion kit  
149 EXP-NBD103 with sequencing kit SQK-LSK108) following the manufacturer's  
150 instructions. Twelve samples were pooled and run on each flow cell, for a total of 24  
151 individual rats. The flow cells had 1373 active pores (January) and 1439 active pores  
152 (March). Sequencing was performed using local base calling in MinKnow v1.3.25  
153 (January) or MinKnow v1.5.5 (March), but both runs were re-basecalled after data  
154 collection using Albacore 2.2.7 with demultiplexing performed in Albacore and filtering  
155 disabled (*options --barcoding --disable\_filtering*).



## 156 Sequence classification

157 All sequences were BLASTed (blastn v2.6.0+) against a locally compiled database  
158 consisting of the combined NCBI other\_genomic and nt databases (downloaded on 13<sup>th</sup>  
159 June 2018 from NCBI). Default blastn parameters were used (gapopen 5, gapextend 2),  
160 and only hits with an e-value of 1e-2 or less were saved. Due to the predominance of  
161 short indels present in nanopore sequence data, we used an initial set of basecalled  
162 data to test whether changing these default penalties affected the results (gapopen 1,  
163 gapextend 1). We found that these adjusted parameters did not qualitatively change our  
164 results.

165 We assigned sequence reads to specific taxon levels using MEGAN6 (v.6.11.7 June  
166 2018) (Huson et al., 2016). We only used reads with BLAST hits having an e-value of  
167  $1 \times 10^{-20}$  or lower (corresponding to a bit score of 115 or higher) and an alignment length  
168 of 100 base pairs or more. To assign reads to taxon levels, we considered all hits  
169 having bit scores within 20% of the bit score of the best hit (MEGAN parameter Top  
170 Percent).

## 171 Multivariate analyses

172 Multivariate analyses were done using the software PRIMER v7 (K. R. Clarke & Gorley,  
173 2015). The data used in the multivariate analyses were in the form of a sample- (i.e.  
174 individual rat) by-family matrix of read counts. All bacteria, rodent, and primate families  
175 were removed. The majority of rodent hits were to rat and mouse, resulting from the

176 rats' own DNA (see below). The majority of the primate hits were to human sequences,  
177 which likely resulted from sample contamination.

178 The read counts were converted to proportions per individual rat, by dividing by the  
179 total count for each rat, to account for the fact that the number of reads varied  
180 substantially among rats (K. Robert Clarke, Robert Clarke, Somerfield, & Gee Chapman,  
181 2006). The proportions were then square-root transformed so that subsequent analyses  
182 were informed by the full range of taxa, rather than just the most abundant families (K.  
183 R. Clarke & Green, 1988). We then calculated a matrix of Bray-Curtis dissimilarities,  
184 which quantified the difference in the gut DNA of each pair of rats based on the square-  
185 root transformed proportions of read counts across families (K. Robert Clarke et al.,  
186 2006).

187 We used unconstrained ordination--specifically, non-metric multidimensional scaling  
188 (nMDS) applied to the dissimilarity matrix--to examine the overall patterns in the diet  
189 composition among rats. To assess the degree to which the diet compositions of rats  
190 were distinguishable among the three locations, we applied canonical analysis of  
191 principal coordinates (CAP) (Anderson & Willis, 2003) to the dissimilarity matrix. CAP is  
192 a constrained ordination which aims to find axes through multivariate data that best  
193 separates *a priori* groups of samples (in this case, the groups are the locations from  
194 which the rats were sampled); CAP is akin to linear discriminant analysis but it can be  
195 used with any resemblance matrix. The out-of-sample classification success was  
196 evaluated using a leave-one-out cross-validation procedure (Anderson & Willis, 2003).

197 We used Similarity Percentage (SIMPER; (K. R. Clarke, 1993)) to characterise and  
198 distinguish between the locations. This allowed us to identify the families with the  
199 greatest percentage contributions to (1) the Bray-Curtis similarities of diets within each  
200 location (**Table S3**) and (2) the Bray-Curtis dissimilarities between each pair of locations  
201 (**Table S4**).

## 202 Results

### 203 DNA sequencing and assignment of reads to taxa

204 After DNA isolation and sequencing, we obtained a total of 82,977 reads from the  
205 January run and 96,150 reads from the March run. Median read lengths were 606 bp  
206 and 527 bp for the January and March datasets, respectively (**Fig. 2A**). These lengths  
207 are considerably shorter than other nanopore sequencing results from both our and  
208 others work (Jain, Olsen, Paten, & Akeson, 2016). This is most likely due to degradation  
209 of the DNA during digestion in the stomach as well as fragmentation during DNA  
210 isolation (Deagle, Eveson, & Jarman, 2006) and sequencing library preparation. The  
211 median phred quality scores per read ranged from 7-12 (0.80 - 0.94 accuracy) for both  
212 runs (**Fig. S1**). The number of reads per barcoded rat sample varied by 10-fold for  
213 January and up to 40-fold in March (**Fig. 2B** and **2C**). This is due mostly to the highly  
214 variable quality of DNA in each sample. However, read length and quality were similar  
215 for all samples (**Fig. S1**).

216 To quantify diet contents we first BLASTed all sequences against a combined database  
217 of the NCBI nt database (the partially non-redundant nucleotide sequences from all

218 traditional divisions of GenBank excluding genome survey sequence, EST, high-  
219 throughput genome, and whole genome shotgun  
220 (<ftp://ftp.ncbi.nlm.nih.gov/blast/db/README>)) and the NCBI other\_genomic database  
221 (RefSeq chromosome records for non-human organisms  
222 (<ftp://ftp.ncbi.nlm.nih.gov/blast/db/README>)). We used BLAST as it is generally viewed  
223 as the gold standard method in metagenomic analyses (McIntyre et al., 2017). Of the  
224 133,022 barcoded reads, 30,535 (23%) hit a sequence in the combined nt and  
225 other\_genomic database at an e-value cutoff of  $1e-2$ .

226 As an initial assessment of the quality of these hits, we examined the alignment lengths  
227 and e-values. We found a bimodal distribution of alignment lengths and a highly skewed  
228 distribution of e-values (**Fig. 3A**). We hypothesized that many of the short alignments  
229 with high e-values were false positives. We thus first filtered this hit set, only retaining  
230 BLAST hits with e-values less than  $1e-20$  and alignments greater than 100 bp. Similar  
231 quality filters have been imposed previously (Srivathsan, Sha, Vogler, & Meier, 2015). A  
232 total of 22,154 hits passed this filter (**Datafile S1**). Mean read quality had substantial  
233 effects on the likelihood of a read yielding a BLAST hit, with almost 40% of high  
234 accuracy read having hits in the March dataset, as compared to 1% of low accuracy hits  
235 (**Fig. 3B**).

236 To specifically assign each sequence read to a taxon, we analysed the BLAST results in  
237 MEGAN6 (Huson et al., 2016). The algorithm employed in MEGAN6 assigns reads to a  
238 most recent common ancestor (MRCA) taxon level. For example, if a read has BLAST  
239 hits to five species, three of which have bit scores within 20% of the best hit, the read

240 will be assigned to the genus, family, order, or higher taxon level that is the MRCA of  
241 those best-hit three species (Huson, Auch, Qi, & Schuster, 2007). If a read matches one  
242 species far better than to any other, by definition, the MRCA is that species.

243 5,334 reads (24%) were not assigned to any taxon by Megan. Of the remainder, 31%  
244 were assigned by MEGAN as being bacterial. 55% of these were *Lactobacillus spp.*  
245 These results match previous studies on rat stomach microbiomes, which have found  
246 lactobacilli to be the dominant taxa (Brownlee & Moss, 1961; Horáková, Zierdt, &  
247 Beaven, 1971; Li et al., 2017; Maurice et al., 2015). Plant-associated *Pseudomonas* and  
248 *Lactococcus* taxa were also common, at 7% and 6%, respectively.

249 MEGAN assigned reads to a wide range of eukaryotic taxa. To conservatively infer  
250 taxon presence, we first reclassified MEGAN species-level assignments to the level of  
251 genus. However, after this, many clear false positive assignments remained (e.g. hippo  
252 and naked mole rat). These matches were generally short and of low identity. To reduce  
253 such false positive taxon inferences, we used information from reads assigned to the  
254 genera *Rattus* (rat) and *Mus* (mouse). We inferred that the reads assigned to *Rattus*  
255 (2,696 reads in total) were true positive genus-level assignments and that the reads  
256 assigned to *Mus* (2,798 reads in total) were false positive genus-level assignments (and  
257 not true positive *Mus*-derived reads). Although rats are known to prey on mice  
258 (Bridgman, Innes, Gillies, Fitzgerald, & King, 2013), if this had occurred, we would  
259 expect that (1) the ratio of mouse to rat reads would be higher in the subset of rats that  
260 had predated mice; (2) in those same rats, the percent identity of the reads assigned to  
261 *Mus* would be higher than in rats that had not predated mice. However, we found that

262 the ratio of mouse to rat reads was similar for all rats. In addition, there was no  
263 evidence of higher percent identities for *Mus* reads from rats that had higher ratios.

264 Notably, the mean percent identity values of the best BLAST hits for *Rattus* and *Mus*  
265 reads differed substantially, with *Rattus* reads having a median identity of 86.4%, and  
266 *Mus* 81.0% (**Fig. 4A**). The mean percent identity for *Rattus* reads corresponds very well  
267 to that expected given the mean quality scores of the reads (assuming the true  
268 sequence of the read is 100% identical to *Rattus*, 86.4% identity corresponds to a  
269 mean quality score of 8.7; **Fig. S2A-C**). There was also a clear difference in the  
270 alignment lengths: the median ratio of alignment length to read length was 0.57 for  
271 *Rattus* and 0.52 for *Mus* (**Fig. 4B**). We note that read identity and the ratio of alignment  
272 length to read length are positively correlated (**Fig. S2G-I**). There is little correlation  
273 between read identity and alignment length alone (**Fig. S2D-F**).

274 Importantly, the majority of diet items have percent identities that overlap with the  
275 *Rattus* reads, and alignment length to read length ratios that often exceed the *Rattus*  
276 reads. This suggests that many diet taxa assignments are correct down to the level of  
277 genus (as the *Rattus*-assigned reads are correct to the level of genus). However, to  
278 further decrease false positive taxon assignments of diet items, we implemented cut-  
279 offs based on the characteristics of the *Mus*- and *Rattus*-assigned reads. For genus-  
280 level assignment, we required at least 82.5% identity and an alignment length to read  
281 length ratio of at least 0.55. These cutoffs exclude 88% of the reads falsely assigned to  
282 *Mus*, instead assigning them correctly to one taxon level higher, the Family *Muridae*.

283 For family-level assignments, we required 77.5% identity, an alignment length to read  
284 length ratio of at least 0.1, and a total alignment length of at least 150 bp. Using higher  
285 cutoffs for the ratio of alignment length to read length excluded a large number of likely  
286 true positive taxa for which only short mtDNA or rDNA database sequences were  
287 present in the databases. For all other read-to-taxon assignments, we placed the read  
288 at the level of Order, or used the taxon level assigned by MEGAN. Using these cutoffs,  
289 16% of all reads were classified at the Genus level; 71% were classified at the Family-  
290 level or below; 89% were classified at the Order-level or below; and 98% were classified  
291 at the Phylum-level or below.

292 After filtering out bacterial, host, and contaminant reads (matching primate DNA), 4,719  
293 reads remained (28% of all classified reads) (**Datafile S2**). Within these, we observed  
294 that a small number of likely false positive taxa remained. Most were single reads with  
295 short alignments: *Poeciliidae* (177 bp); *Salmonidae* (172 bp); *Cyprinodontiformes* (140  
296 bp and 177 bp); and *Octopodidae* (151 bp). The exception to this were three reads from  
297 two rats matching *Buthidae* (scorpions), which had alignment lengths of 762 bp, 664 bp,  
298 and 298 bp. It is unlikely these are true positives, and instead we hypothesise that these  
299 rats predated harvestmen (*Opiliones*), a closely related sister taxon within *Arachnida* but  
300 lacking significant amounts of genomic data. Despite the presence of these false  
301 positive taxa, we did not further increase the stringency of our filters, allowing us to  
302 resolve most taxa at the level of family, with a small rate of false positive inference  
303 (here, eight clear instances out of almost 5,000 reads).

## 304 Identification of diet

305 Within each rat, a wide variety of plant, animal, and fungal orders were discernible,  
306 ranging from two to 25 orders per rat (mean 8.7; **Fig. 5**). In total, we identified taxa from  
307 68 different Families, 55 different Orders, 15 different Classes, and eight different Phyla  
308 (**Fig 6**). Plants were the primary diet item, with the largest fraction of rats consuming four  
309 predominant orders: *Poales* (grasses), *Fabales* (legumes), *Arecales* (palms), and  
310 *Araucariales* (podocarps). The dominance of plant matter (fruits and seeds) in rat diets  
311 has been established previously (Riofrío-Lazo & Páez-Rosas, 2015; Sweetapple &  
312 Nugent, 2007). Animal taxa made up a smaller component of each rat's diet, with  
313 *Insecta* dominating: *Hymenoptera*, *Coleoptera*, *Lepidoptera* (moths and butterflies),  
314 *Blattodea* (cockroaches), *Diptera* (flies), and *Phasmatodea* (stick insects). In addition,  
315 *Stylommatophora* (slugs and snails) were present in substantial numbers (**Fig. 6A** and  
316 **6B**). Fungi were only a small component of the rats' diet, although several orders were  
317 present: *Sclerotiales* (plant pathogens), *Saccharomycetales* (budding yeasts),  
318 *Mucorales* (pin molds), *Russulales* (brittle-gills and milk-caps), and *Chytriales* (black  
319 yeasts). Finally, for many rats, a substantial proportion of the stomach contents were  
320 parasitic worms (primarily *Spirurida* (nematodes) and *Hymenolepididae* (tapeworms)).  
321 Due to our metagenomic approach, the fraction of each element of the rats' diets is  
322 distorted by biases in genomic databases: whole genome data exists for only a few taxa,  
323 while mtDNA and rDNA sequence data are present in the database for the vast majority  
324 of animal and plant genera. To quantify this bias, we determined the fraction of hits that  
325 mapped to non-genomic database sequences relative to the fraction of hits that mapped



326 to genomic DNA. By quantifying this fraction for species with complete genome  
327 sequences in the database and species without complete genomes we aimed to assess  
328 the effects of this bias.

329 For the majority of animals with sequenced genomes in the database, we found that the  
330 fraction of reads that mapped genomic sequence ranged from 61% (*Gallus*) to 73%  
331 (*Rattus*) to 100% (*Coturnix* and *Numida*) (**Fig. 7**). We hypothesise that this variation is  
332 likely due to the type of tissue sequenced. For *Rattus* the sequenced tissue was  
333 primarily stomach muscle, which has a relatively high fraction of mtDNA; for *Coturnix*  
334 and *Numida* it may have been eggs. For plants with sequenced genomes, the fraction of  
335 reads matching genomic sequence was generally higher: between 88% (*Zea*) and 98%  
336 (*Cenchrus*).

337 In contrast, for genera with little or no genomic sequence in the database, the vast  
338 majority of matches were solely to mtDNA, rDNA, or microsatellite loci: 90% of *Phoenix*  
339 (date palm) hits; all *Helix* (snail); and all *Rhaphidophora* (cave weta) hits. All *Artioposthia*  
340 (New Zealand flatworm) hits were to rDNA. These results indicate that for genera with  
341 no genomic sequence data, we have underestimated the actual number of sequences  
342 from that taxon by approximately three- to twenty-fold (for animals and plants,  
343 respectively). It is difficult to determine how these numbers correlate with biomass.

344 Close examination of the sequence classification data suggested that specific families  
345 (and orders) were overrepresented in the diets of rats from particular locations. For  
346 example, six out of eight rats from the native estuarine bush habitat (OB) consumed  
347 *Arecaceae*, while only one in the restored wetland area (LB) did. All three rats that

348 consumed *Phaseanidae* were from the native estuarine habitat (OB). All five rats that  
349 consumed *Solanales* were from the restored wetland area. These patterns suggested  
350 that it might be possible to use diet components alone to pinpoint the habitat from which  
351 each rat was sampled.

## 352 nMDS and CAP analysis by location

353 In order to determine if diet composition of the rats differed consistently between  
354 locations, we first performed an unconstrained analysis using nMDS on taxa assigned at  
355 the family level. Using family rather than order or genus provides a balance between  
356 how precisely we identify the taxon of diet item (genus, family, order), and whether we  
357 assign a taxon at all. While family-level assignments are less precise than genus-level,  
358 only 16% of all reads were classified at the genus level, while 71% were classified at the  
359 family level.

360 The family-level unconstrained ordination (nMDS) showed no obvious grouping of rats  
361 with respect to the locations (**Fig. 8a**), indicating that locations did not correspond to the  
362 predominant axes of variation among the diets. However, a constrained ordination  
363 analysis (CAP) identified axes of variation that distinguished the diets of rats from  
364 different locations (**Fig. 8b**). We found that the CAP axes correctly classified the  
365 locations of 19 out of 24 (79%) rats using a leave-one-out procedure. The families  
366 having the largest correlations with the first two principal coordinates, and most  
367 responsible for the separation between groups, were primarily plants: *Arecaceae*,

368 *Podocarpaceae*, *Piperaceae*, and *Pinaceae*. In addition, insect groups (*Cerambycids*  
369 and *Formicids*) and birds (*Phaseanidae* and *Numididae*) played a role (**Fig. 8c**).

370 The families driving similarity within the three locations (i.e., had the greatest within-  
371 location SIMPER scores) varied among locations. LB had average Bray-Curtis within-  
372 location similarity of 13%; mostly attributable to *Hymenolepidae* (accounting for 51% of  
373 the within-group similarity), *Solanaceae* (11%), and *Fabaceae* (11%). The average  
374 similarity for OB was 21%, with the greatest contributing taxa being *Arecaceae* (33%),  
375 *Poaceae* (23%), *Fabaceae* (9%), and *Phasianidae* (8%). The average similarity for WP  
376 was 24%, with the greatest contributing taxa being *Poaceae* (72%) (**Table S4**).

## 377 Discussion

### 378 Accuracy and sensitivity

379 Here we have shown that using a simple metagenomic approach with error-prone long  
380 reads allows rapid and accurate classification of rat diet components. We expect that  
381 this technique can be used to infer diet for a wide variety of animal and sample types,  
382 including samples that use less invasive collection methods, such as fecal matter. The  
383 sensitivity of this approach will likely improve as the accuracy and yield of Oxford  
384 Nanopore sequencing increases. The analysis here is based on less than 200,000 reads  
385 from two flow cells. The rapid improvement of this technology is such that current  
386 yields are often far in excess of two million reads per flow cell. The method will also

387 improve as the diversity of taxa in genomic sequence databases increases. Several  
388 aspects of the data support this.

389 First, we note that we did not find BLAST hits for the majority of reads. This is partially  
390 due the relatively low accuracy of the Oxford Nanopore sequencing platform at the time  
391 these data were collected (approximately 87%). However, the fraction of reads yielding  
392 hits in the database increased substantially for higher quality reads, approaching 40%  
393 for very high quality reads (**Fig. 3b**). Other factors also likely reduce the numbers of  
394 BLAST hits, such as the paucity of genome sequence data for many taxa. This is  
395 convincingly illustrated by comparing across taxa the fraction of genomic hits to  
396 mitochondrial or rDNA sequence hits.

397 As the species sampling of genomic databases increases (Lewin et al., 2018), the  
398 taxon-level precision of this method will improve. Given the current rate of genomic  
399 sequencing, with careful sampling, the vast majority of multicellular plant and animal  
400 families (and even genera) will likely have at least one type species with a sequenced  
401 genome within the next decade. Continued advancement in sequence database search  
402 algorithms as compared to current methods (Kim et al., 2016; Nasko, Koren, Phillippy,  
403 & Treangen, 2018; Wood & Salzberg, 2014) should considerably decrease the  
404 computational workload necessary to find matching sequences.

405 Although metagenomic approaches decrease the bias arising from PCR amplification of  
406 specific DNA regions, additional biases can arise, as the presence or absence of  
407 species and genera can only be inferred for those species or genera present in

408 genomic databases. Although this is similarly true for metabarcoding approaches,  
409 metabarcode databases are rapidly becoming more comprehensive in terms of species  
410 representation as compared to genomic databases. Importantly, genomic sequence  
411 databases are rapidly increasing in species diversity, as are the methods to query these  
412 large databases(Kim et al., 2016; Wood & Salzberg, 2014)

413 To decrease biases in genomic databases, some previous studies have performed  
414 metagenomic classification using mitogenome data alone. Using such methods,  
415 Srivathsan et al and Paula et al. (2016) (Srivathsan, Ang, Vogler, & Meier, 2016); (Paula  
416 et al., 2016) found between 0.004% and 0.008% of all metagenomic reads matched  
417 mitogenomes from diet taxa. Limiting database searches to mitogenomes partially  
418 ameliorates biases in terms of taxon field in terms of taxon representation (i.e. most taxa  
419 will have similar levels of genomic representation in the databases). However, it  
420 considerably decreases diet resolution given that for some taxa, only a small percentage  
421 of sequence reads derive from the mitochondria as opposed to the nuclear genome.

422 It is also important to note that our interest in diet also includes resolving relative  
423 biomass and relative numbers of each prey species, neither of which necessarily  
424 correlate well with the amount of DNA (either mitochondrial or nuclear) purified from a  
425 sample. Even a simple correction for the fraction of reads matching mitochondrial versus  
426 nuclear genomes is difficult, as different plant and animal tissues differ considerably in  
427 the relative amounts of mitochondrial versus nuclear DNA (e.g. leaf versus fruit).

## 428 Methodological advantages

429 We found that rats consumed many soft-bodied species (e.g. mushrooms, flat worms,  
430 slugs, and lepidopterans) that would be difficult to identify using visual inspection of  
431 stomach contents. Achieving data on such a wide variety of taxa would be difficult to  
432 quantify using other molecular methods, as there are no universal 18S or COI universal  
433 primers capable of amplifying sequences in all these taxa. While it might be possible to  
434 use primer sets targeted at different phyla or orders, quantitatively comparing diet  
435 components across these using sequences amplified with different primer sets is  
436 extremely difficult due to differences in primer binding and PCR efficiency.

437 The nanopore MinION-based sequencing method used in this simple metagenomic  
438 approach has several advantages. Compared to other high throughput sequencing  
439 technologies (e.g. Illumina, IonTorrent, or PacBio), there is no initial capital investment  
440 required to use the platform. On a per-sample basis, data generation is inexpensive  
441 (approximately \$150 USD per barcoded sample, and approximately half this price if  
442 reagents are purchased in bulk). Library preparation and sequencing can be extremely  
443 rapid, going from DNA sample to sequence in less than two hours (Zaaijer et al., 2017).  
444 Furthermore, the sequencing platform itself is highly portable. As the cost of nanopore-  
445 based sequencing continues to decrease (both per sample and per base pair), it should  
446 become possible to use molecular methods for routine ecological monitoring of species  
447 presence or absence in field settings, without significant investment in infrastructure  
448 (Kamenova et al., 2017). Finally, we suggest that our approach of standardising the read  
449 counts by sample, followed by an optional transformation such as square root and

450 dissimilarity-based multivariate ordination, offers a useful analytical pipeline for  
451 analysing metagenomic diet-composition data.

452 We note that modifications to our approach might further increase the precision of our  
453 ability to infer community composition. Any error-prone long read dataset (i.e. PacBio or  
454 ONT) has both short (e.g. 500 bp) and long (e.g. 5000 bp) reads, as well as high quality  
455 (e.g. mean accuracy greater than 90%) and low quality (e.g. mean accuracy less than  
456 80%) reads. When inferring community composition, a null expectation is that taxa  
457 should be equally represented by long, high quality reads as they are by short, low  
458 quality reads. If some taxa are represented only by short, low quality reads, this  
459 suggests that these taxa may be false positive inferences. Similarly, the difficulty in  
460 correctly mapping short inaccurate reads could be mitigated by weighting the probability  
461 of taxon mapping by the number of long, accurate reads that map to certain taxa. Thus,  
462 the fact that not all reads are extremely long and accurate does not mean that they  
463 cannot all be used to infer taxon presence in metagenomic analyses.

## 464 Conclusion

465 Here we have shown that a rapid error-prone long read metagenomic approach is able  
466 to accurately characterise diet taxa at the family-level, and distinguish between the diets  
467 of rats according to the locations from which they were sourced. This information may  
468 be used to guide conservation efforts toward specific areas and habitats in which native  
469 species are most at risk from this highly destructive introduced predator.

## 470 Acknowledgements

471 This work was supported by a Massey University Research Fund to NF, a Marsden  
472 Fund Grant (15-MAU-136) to JD and Marsden Fund Grant MAU1703 to OS. Thanks to  
473 Friends of Okura Bush, Mary Stewart from Auckland Council, and Gillian Wadams and  
474 the volunteers at the Waitakere Ranges for collecting rat samples and aiding in rat  
475 species identification. Sample collection was performed under (Auckland Council  
476 Permit to Undertake Research WS1064).

## 477 References

- 478 1. Anantharaman, K., Brown, C. T., Hug, L. A., Sharon, I., Castelle, C. J., Probst, A.  
479 J., ... Banfield, J. F. (2016). Thousands of microbial genomes shed light on  
480 interconnected biogeochemical processes in an aquifer system. *Nature*  
481 *Communications*, 7, 13219.
- 482 2. Anderson, M. J., & Willis, T. J. (2003). Canonical Analysis Of Principal  
483 Coordinates: A Useful Method Of Constrained Ordination For Ecology. *Ecology*,  
484 84(2), 511–525.
- 485 3. Basha, W. A., Chamberlain, A. T., Zaki, M. E., Kandeel, W. A., & Fares, N. H.  
486 (2016). Diet reconstruction through stable isotope analysis of ancient mummified  
487 soft tissues from Kulubnarti (Sudanese Nubia). *Journal of Archaeological*  
488 *Science: Reports*, 5, 71–79.
- 489 4. Breitwieser, F. P., & Salzberg, S. L. (2018). KrakenHLL: Confident and fast  
490 metagenomics classification using unique k-mer counts. *bioRxiv*. Retrieved from  
491 <https://www.biorxiv.org/content/early/2018/06/06/262956.abstract>
- 492 5. Bridgman, L. J., Innes, J., Gillies, C., Fitzgerald, N., & King, C. M. (2013). Do ship  
493 rats display predatory behaviour towards house mice? *Animal Behaviour*, 86(2),  
494 257–268.
- 495 6. Brown, K. P., Moller, H., Innes, J., & Jansen, P. (2008). Identifying predators at  
496 nests of small birds in a New Zealand forest. *The Ibis*, 140(2), 274–279.
- 497 7. Brownlee, A., & Moss, W. (1961). The influence of diet on lactobacilli in the  
498 stomach of the rat. *The Journal of Pathology*, 82(2), 513–516.
- 499 8. Carreon-Martinez, L., & Heath, D. D. (2010). Revolution in food web analysis and  
500 trophic ecology: diet analysis by DNA and stable isotope analysis. *Molecular*  
501 *Ecology*, 19(1), 25–27.
- 502 9. Clarke, K. R. (1993). Non-parametric multivariate analyses of changes in



- 503 community structure. *Austral Ecology*, 18(1), 117–143.
- 504 10. Clarke, K. R., & Gorley, R. N. (2015). *PRIMER v7: User Manual/Tutorial* (p. 296).
- 505 PRIMER-E, Plymouth.
- 506 11. Clarke, K. R., & Green, R. H. (1988). Statistical Design and Analysis for a
- 507 “biological Effects” Study. *Marine Ecology Progress Series*, 46, 213–226.
- 508 12. Clarke, K. R., Robert Clarke, K., Somerfield, P. J., & Gee Chapman, M. (2006).
- 509 On resemblance measures for ecological studies, including taxonomic
- 510 dissimilarities and a zero-adjusted Bray–Curtis coefficient for denuded
- 511 assemblages. *Journal of Experimental Marine Biology and Ecology*, 330(1), 55–
- 512 80.
- 513 13. Daniel, M. J. (1973). Seasonal Diet Of The Ship Rat (*Rattus Rattus*) In Lowland
- 514 Forest In New Zealand. *Proceedings*, 20, 21–30.
- 515 14. Deagle, B. E., Eveson, J. P., & Jarman, S. N. (2006). Quantification of damage in
- 516 DNA recovered from highly degraded samples--a case study on DNA in faeces.
- 517 *Frontiers in Zoology*, 3, 11.
- 518 15. Deagle, B. E., Jarman, S. N., Coissac, E., Pompanon, F., & Taberlet, P. (2014).
- 519 DNA metabarcoding and the cytochrome c oxidase subunit I marker: not a
- 520 perfect match. *Biology Letters*, 10(9). <https://doi.org/10.1098/rsbl.2014.0562>
- 521 16. Diamond, J. M., & Veitch, C. R. (1981). Extinctions and introductions in the new
- 522 zealand avifauna: cause and effect? *Science*, 211(4481), 499–501.
- 523 17. Dowding, J. E., & Murphy, E. C. (2001). The impact of predation by introduced
- 524 mammals on endemic shorebirds in New Zealand: a conservation perspective.
- 525 *Biological Conservation*, 99(1), 47–64.
- 526 18. Dunlap, M., & Pawlik, J. R. (1996). Video-monitored predation by Caribbean reef
- 527 fishes on an array of mangrove and reef sponges. *Marine Biology*, 126(1), 117–
- 528 123.
- 529 19. Fierer, N., Leff, J. W., Adams, B. J., Nielsen, U. N., Bates, S. T., Lauber, C. L., ...
- 530 Caporaso, J. G. (2012). Cross-biome metagenomic analyses of soil microbial
- 531 communities and their functional attributes. *Proceedings of the National*
- 532 *Academy of Sciences of the United States of America*, 109(52), 21390–21395.
- 533 20. Gibbs, G. W. (1998). Why are some weta (Orthoptera: Stenopelmatidae)
- 534 vulnerable yet others are common? *Journal of Insect Conservation*, 2(3-4), 161–
- 535 166.
- 536 21. Graham, N. A. J., Wilson, S. K., Carr, P., Hoey, A. S., Jennings, S., & MacNeil, M.
- 537 A. (2018). Seabirds enhance coral reef productivity and functioning in the
- 538 absence of invasive rats. *Nature*, 559(7713), 250–253.
- 539 22. Hobson, K. A. (1987). Use of stable-carbon isotope analysis to estimate marine
- 540 and terrestrial protein content in gull diets. *Canadian Journal of Zoology*, 65(5),
- 541 1210–1213.
- 542 23. Horáková, Z., Zierdt, C. H., & Beaven, M. A. (1971). Identification of lactobacillus
- 543 as the source of bacterial histidine decarboxylase in rat stomach. *European*
- 544 *Journal of Pharmacology*, 16(1), 67–77.
- 545 24. Hover, B. M., Kim, S.-H., Katz, M., Charlop-Powers, Z., Owen, J. G., Ternei, M.

- 546 A., ... Brady, S. F. (2018). Culture-independent discovery of the malacidins as  
547 calcium-dependent antibiotics with activity against multidrug-resistant Gram-  
548 positive pathogens. *Nature Microbiology*, 3(4), 415–422.
- 549 25. Huson, D. H., Auch, A. F., Qi, J., & Schuster, S. C. (2007). MEGAN analysis of  
550 metagenomic data. *Genome Research*, 17(3), 377–386.
- 551 26. Huson, D. H., Beier, S., Flade, I., Górska, A., El-Hadidi, M., Mitra, S., ... Tappu,  
552 R. (2016). MEGAN Community Edition - Interactive Exploration and Analysis of  
553 Large-Scale Microbiome Sequencing Data. *PLoS Computational Biology*, 12(6),  
554 e1004957.
- 555 27. Huson, D. H., Mitra, S., Ruscheweyh, H.-J., Weber, N., & Schuster, S. C. (2011).  
556 Integrative analysis of environmental sequences using MEGAN4. *Genome*  
557 *Research*, 21(9), 1552–1560.
- 558 28. Jain, M., Olsen, H. E., Paten, B., & Akeson, M. (2016). The Oxford Nanopore  
559 MinION: delivery of nanopore sequencing to the genomics community. *Genome*  
560 *Biology*, 17(1), 239.
- 561 29. Jarman, S. N., Deagle, B. E., & Gales, N. J. (2004). Group-specific polymerase  
562 chain reaction for DNA-based analysis of species diversity and identity in dietary  
563 samples. *Molecular Ecology*, 13(5), 1313–1322.
- 564 30. Jarman, S. N., Gales, N. J., Tierney, M., Gill, P. C., & Elliott, N. G. (2002). A DNA-  
565 based method for identification of krill species and its application to analysing  
566 the diet of marine vertebrate predators. *Molecular Ecology*, 11(12), 2679–2690.
- 567 31. Kamenova, S., Bartley, T. J., Bohan, D. A., Boutain, J. R., Colautti, R. I.,  
568 Domaizon, I., ... Massol, F. (2017). Chapter Three - Invasions Toolkit: Current  
569 Methods for Tracking the Spread and Impact of Invasive Species. In D. A.  
570 Bohan, A. J. Dumbrell, & F. Massol (Eds.), *Advances in Ecological Research* (Vol.  
571 56, pp. 85–182). Academic Press.
- 572 32. Kim, D., Song, L., Breitwieser, F. P., & Salzberg, S. L. (2016). Centrifuge: rapid  
573 and sensitive classification of metagenomic sequences. *Genome Research*,  
574 26(12), 1721–1729.
- 575 33. King, R. A., Read, D. S., Traugott, M., & Symondson, W. O. C. (2008). Molecular  
576 analysis of predation: a review of best practice for DNA-based approaches.  
577 *Molecular Ecology*, 17(4), 947–963.
- 578 34. Leray, M., Yang, J. Y., Meyer, C. P., Mills, S. C., Agudelo, N., Ranwez, V., ...  
579 Machida, R. J. (2013). A new versatile primer set targeting a short fragment of  
580 the mitochondrial COI region for metabarcoding metazoan diversity: application  
581 for characterizing coral reef fish gut contents. *Frontiers in Zoology*, 10, 34.
- 582 35. Lewin, H. A., Robinson, G. E., Kress, W. J., Baker, W. J., Coddington, J.,  
583 Crandall, K. A., ... Zhang, G. (2018). Earth BioGenome Project: Sequencing life  
584 for the future of life. *Proceedings of the National Academy of Sciences of the*  
585 *United States of America*, 115(17), 4325–4333.
- 586 36. Li, D., Chen, H., Mao, B., Yang, Q., Zhao, J., Gu, Z., ... Chen, W. (2017).  
587 Microbial Biogeography and Core Microbiota of the Rat Digestive Tract.  
588 *Scientific Reports*, 8, 45840.

- 589 37. Major, H. L., Jones, I. L., Charette, M. R., & Diamond, A. W. (2007). Variations in  
590 the diet of introduced Norway rats (*Rattus norvegicus*) inferred using stable  
591 isotope analysis. *Journal of Zoology*, 271(4), 463–468.
- 592 38. Maurice, C. F., Knowles, S. C. L., Ladau, J., Pollard, K. S., Fenton, A., Pedersen,  
593 A. B., & Turnbaugh, P. J. (2015). Marked seasonal variation in the wild mouse gut  
594 microbiota. *The ISME Journal*, 9(11), 2423–2434.
- 595 39. McIntyre, A. B. R., Ounit, R., Afshinnekoo, E., Prill, R. J., Hénaff, E., Alexander,  
596 N., ... Mason, C. E. (2017). Comprehensive benchmarking and ensemble  
597 approaches for metagenomic classifiers. *Genome Biology*, 18(1), 182.
- 598 40. Nasko, D. J., Koren, S., Phillippy, A. M., & Treangen, T. J. (2018). RefSeq  
599 database growth influences the accuracy of k-mer-based species identification,  
600 1–21.
- 601 41. Paula, D. P., Linard, B., Crampton-Platt, A., Srivathsan, A., Timmermans, M. J. T.  
602 N., Sujii, E. R., ... Vogler, A. P. (2016). Uncovering Trophic Interactions in  
603 Arthropod Predators through DNA Shotgun-Sequencing of Gut Contents. *PLoS*  
604 *One*, 11(9), e0161841.
- 605 42. Pawluczyk, M., Weiss, J., Links, M. G., Egaña Aranguren, M., Wilkinson, M. D., &  
606 Egea-Cortines, M. (2015). Quantitative evaluation of bias in PCR amplification  
607 and next-generation sequencing derived from metabarcoding samples.  
608 *Analytical and Bioanalytical Chemistry*, 407(7), 1841–1848.
- 609 43. Pereira, R. P. A., Peplies, J., Brettar, I., & Hoefle, M. G. (2018). *Impact of DNA*  
610 *polymerase choice on assessment of bacterial communities by a Legionella*  
611 *genus-specific next-generation sequencing approach*. *bioRxiv*.  
612 <https://doi.org/10.1101/247445>
- 613 44. Pierce, G. J., & Boyle. (1991). A review of methods for diet analysis in  
614 piscivorous marine mammals. *Oceanography and Marine Biology: An Annual*  
615 *Review*, 29, 409–486.
- 616 45. Riofrío-Lazo, M., & Páez-Rosas, D. (2015). Feeding Habits of Introduced Black  
617 Rats, *Rattus rattus*, in Nesting Colonies of Galapagos Petrel on San Cristóbal  
618 Island, Galapagos. *PLoS One*, 10(5), e0127901.
- 619 46. Russell, J. C., Innes, J. G., Brown, P. H., & Byrom, A. E. (2015). Predator-Free  
620 New Zealand: Conservation Country. *Bioscience*, 65(5), 520–525.
- 621 47. Soininen, E. M., Valentini, A., Coissac, E., Miquel, C., Gielly, L., Brochmann, C.,  
622 ... Taberlet, P. (2009). Analysing diet of small herbivores: the efficiency of DNA  
623 barcoding coupled with high-throughput pyrosequencing for deciphering the  
624 composition of complex plant mixtures. *Frontiers in Zoology*, 6, 16.
- 625 48. Srivathsan, A., Ang, A., Vogler, A. P., & Meier, R. (2016). Fecal metagenomics for  
626 the simultaneous assessment of diet, parasites, and population genetics of an  
627 understudied primate. *Frontiers in Zoology*, 13, 17.
- 628 49. Srivathsan, A., Sha, J. C. M., Vogler, A. P., & Meier, R. (2015). Comparing the  
629 effectiveness of metagenomics and metabarcoding for diet analysis of a leaf-  
630 feeding monkey (*Pygathrix nemaeus*). *Molecular Ecology Resources*, 15(2), 250–  
631 261.

- 632 50. Stringer, I. A. N., Bassett, S. M., McLean, M. J., McCartney, J., & Parrish, G. R.  
633 (2003). Biology and conservation of the rare New Zealand land snail *Paryphanta*  
634 *busbyi watti* (Mollusca, Pulmonata). *Invertebrate Biology: A Quarterly Journal of*  
635 *the American Microscopical Society and the Division of Invertebrate*  
636 *Zoology/ASZ*, 122(3), 241–251.
- 637 51. Sweetapple, P. J., & Nugent, G. (2007). Ship rat demography and diet following  
638 possum control in a mixed podocarp—hardwood forest. *New Zealand Journal of*  
639 *Ecology*, 31(2), 186–201.
- 640 52. Tedersoo, L., Anslan, S., Bahram, M., Põlme, S., Riit, T., Liiv, I., ... Others.  
641 (2015). Shotgun metagenomes and multiple primer pair-barcode combinations of  
642 amplicons reveal biases in metabarcoding analyses of fungi. *MycKeys*, 10, 1.
- 643 53. Towns, D. R., Daugherty, C. H., & Cree, A. (2001). Raising the prospects for a  
644 forgotten fauna: a review of 10 years of conservation effort for New Zealand  
645 reptiles. *Biological Conservation*, 99(1), 3–16.
- 646 54. Volpov, B. L., Hoskins, A. J., Battaile, B. C., Viviant, M., Wheatley, K. E.,  
647 Marshall, G., ... Arnould, J. P. Y. (2015). Identification of Prey Captures in  
648 Australian Fur Seals (*Arctocephalus pusillus doriferus*) Using Head-Mounted  
649 Accelerometers: Field Validation with Animal-Borne Video Cameras. *PloS One*,  
650 10(6), e0128789.
- 651 55. Wood, D. E., & Salzberg, S. L. (2014). Kraken: ultrafast metagenomic sequence  
652 classification using exact alignments. *Genome Biology*, 15(3), R46.
- 653 56. Xu, Z., & Knight, R. (2015). Dietary effects on human gut microbiome diversity.  
654 *The British Journal of Nutrition*, 113 Suppl, S1–S5.
- 655 57. Zaaijer, S., Gordon, A., Speyer, D., Piccone, R., Groen, S. C., & Erlich, Y. (2017).  
656 Rapid re-identification of human samples using portable DNA sequencing. *eLife*,  
657 6. <https://doi.org/10.7554/eLife.27798>  
658

## 659 Data Accessibility

660 Sequence data are available in the SRA archive (accession number PRJEB27647)

## 661 Author Contributions

662 WP, JD, NF, and OS conceived the project. WP performed the stomach dissections.

663 WP and NF optimised the genomic DNA isolation and library preparation. NF performed

664 the nanopore sequencing. GB and OS processed and performed quality control on the

665 sequencing data. WP and OS performed the sequence classification. WP, AS, NF, and  
666 OS analysed the data. WP, NF, AS, and OS wrote the paper, with input from all authors.

## 667 Tables and Figures

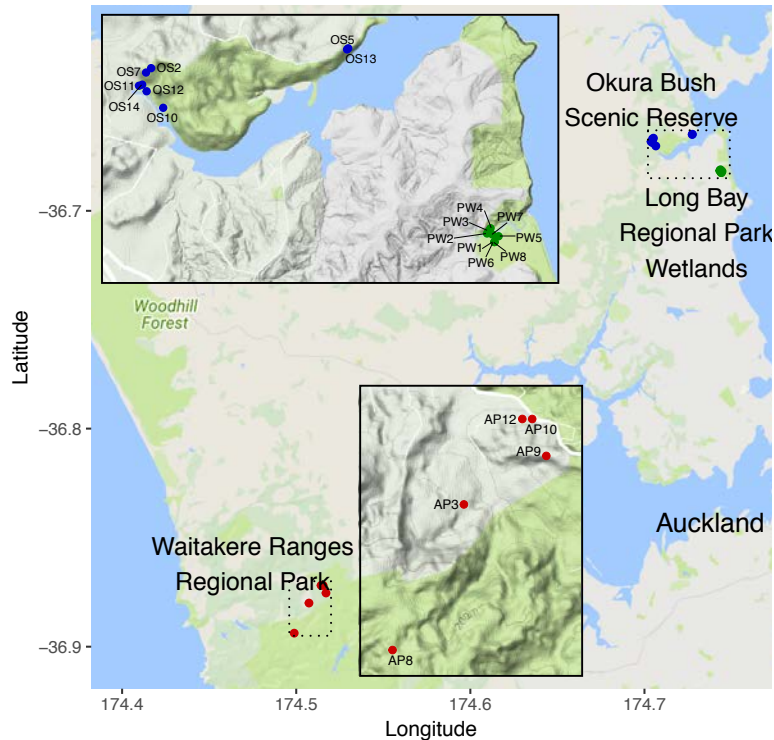

668

669 **Fig. 1. Location of rat sampling sites** in the greater Auckland area in the North Island  
670 of New Zealand. Each point indicates a trap where one rat was captured, with the  
671 colour of the points indicating the three broad locations: the native estuarine bush  
672 habitat of Okura Bush (OB), the restored wetland of Long Bay (LB), and the native  
673 forest of Waitakere Park (WP). The two insets show the three locations in higher  
674 resolution with topographical details. Green indicates park areas. Precise geographical  
675 coordinates were only available for five out of eight rats in WP.

676



677

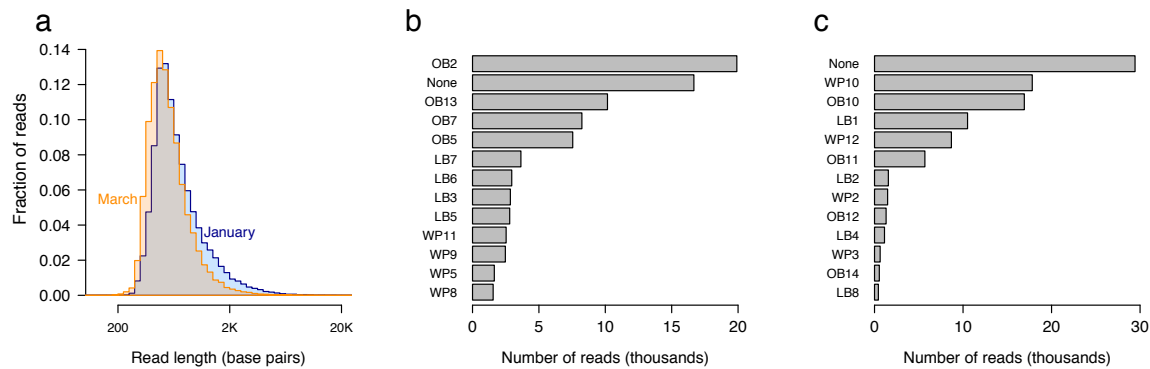

678

679 **Fig. 2. Results of nanopore metagenomic sequencing of rat stomach contents. (a)**  
680 **Read length distribution for January and March nanopore runs.** Read lengths  
681 varied between ~300 and 3,000 bp, with a small number greater than 10,000 bp. **(b)**  
682 **and (c) Barcode distributions for January and March runs, respectively.** We  
683 multiplexed the samples on the flow cells, using 12 barcodes per flow cell. The  
684 distribution of read numbers across barcodes was quite uneven, varying by up to 40-  
685 fold in some cases. 20% (January) and 30% (March) of all reads could not be assigned  
686 to a barcode (“None”). The inability to assign these reads to a barcode is due primarily  
687 to their lower quality.

688

689

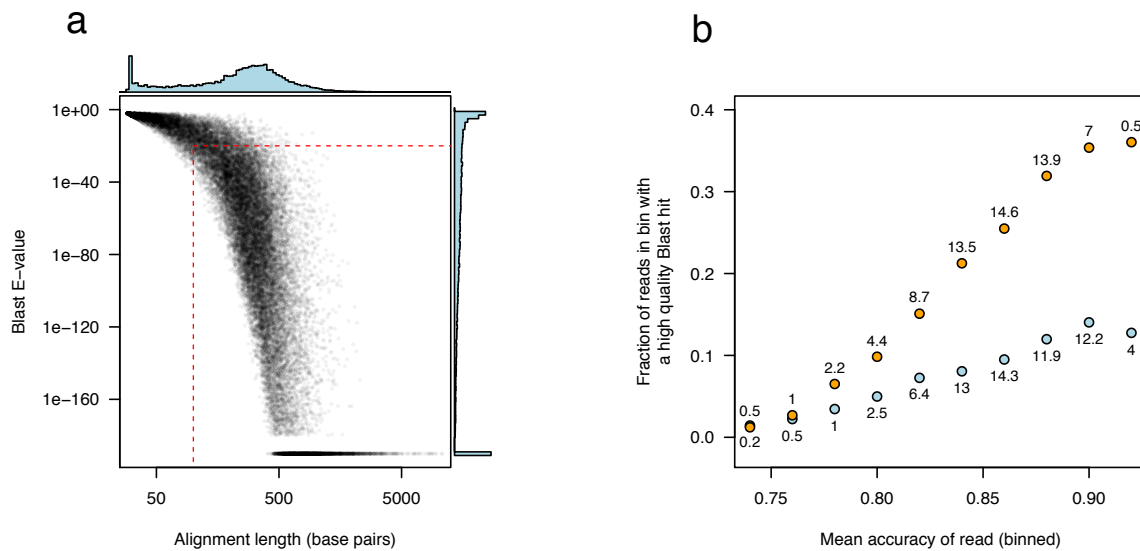

690

691 **Fig. 3. BLAST hits of metagenomic reads. (a) Plot with marginal histograms**  
692 **showing the e-value and alignment length of the top BLAST hit for each read.** We  
693 observed bimodal distributions of alignment lengths and e-values. The y-axis is plotted  
694 on a log scale, with zero e-values suppressed by adding a small number ( $1e-190$ ) to  
695 each e-value. The horizontal red dotted line indicates the e-value cutoff we  
696 implemented and the vertical red dotted line indicates the length cutoff (e-value  $< 1e-20$   
697 and alignment length of 100, respectively) to decrease false positive hits. **(b) The**  
698 **fraction of reads with high quality BLAST hits (e-value  $< 1e-20$ ) increases as a**  
699 **function of read accuracy.** We binned the data according to mean read accuracy (bin  
700 width = 0.02) and calculated the fraction of reads within each bin that have a high  
701 quality BLAST hit for the January and March runs separately (blue and orange points,  
702 respectively). The number of reads in each bin is indicated above each point (in  
703 thousands). There is a clear positive correlation between mean accuracy and the  
704 likelihood of a high-quality BLAST hit, reaching almost 40% for very high quality reads  
705 (accuracy  $>92.5\%$ ).

706

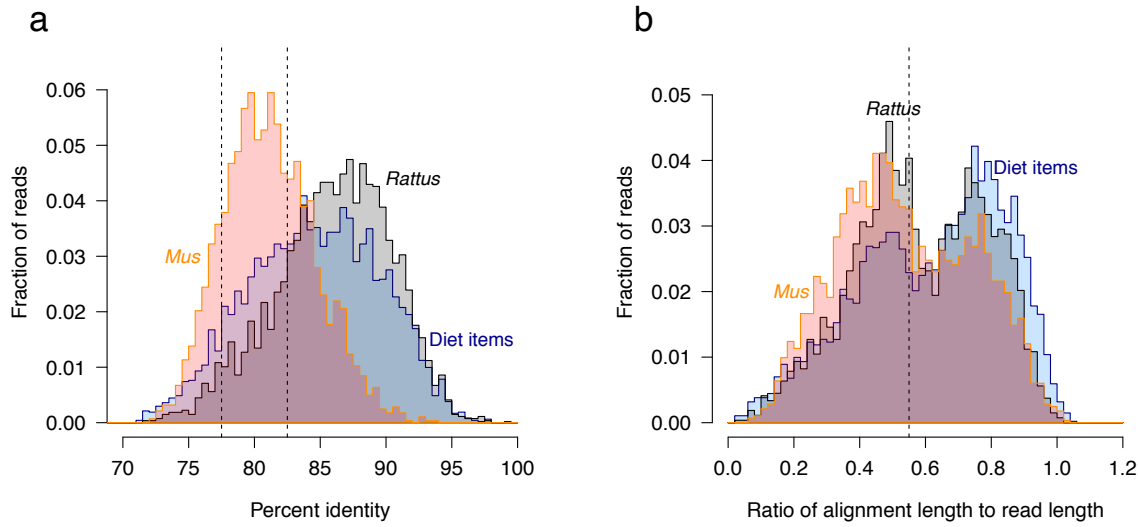

707

708 **Fig. 4. Distributions of percent identity and length for alignments of reads**  
709 **matching *Rattus* (rat), *Mus* (mouse), and diet items. (a) Percent identity for**  
710 **alignments of rat (*Rattus*) and diet items is much higher than for mouse (*Mus*).**  
711 Histograms are shown for the percent identity of the alignment of the top BLAST hit  
712 with the read. *Mus* matches show a clear shift to the left (lower percent identity) as  
713 compared to *Rattus* and diet items. Although different genera, *Mus* and *Rattus* are in  
714 the same family (*Muridae*). The dotted lines indicate the cut-offs that we implemented  
715 for inferring reads as belonging to a specific genus (above 82.5% identity) or family  
716 (above 77.5% identity). (b) Ratios of alignment lengths to read lengths of rat  
717 (*Rattus*) and diet items are higher than for mouse (*Mus*). This plot is analogous to  
718 that in (a). The dotted line indicates the cut-off that we implemented for inferring reads  
719 as belonging to a specific genus (above 0.55).



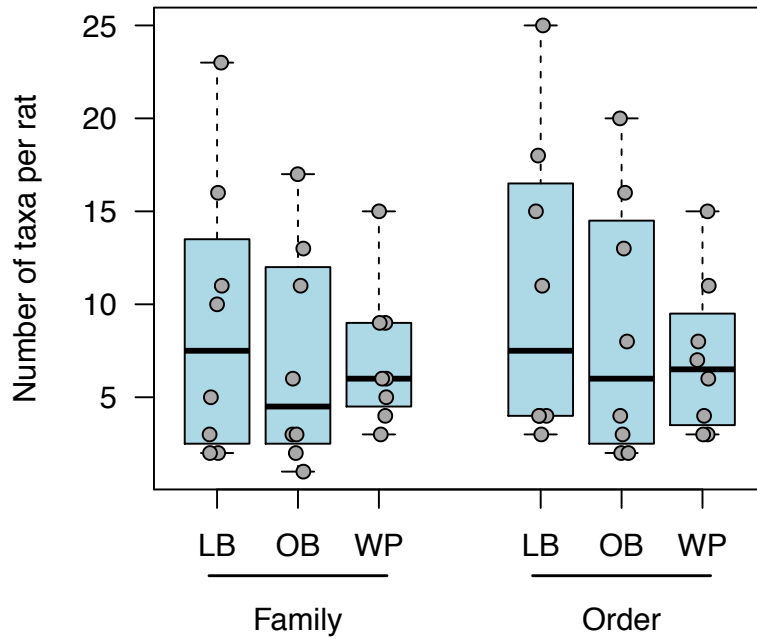

720

721 **Fig. 5. Numbers of taxa in individual rats.** Each boxplot indicates the range of families  
722 (left boxes) or orders (right boxes) consumed by each rat in each location (OB: Okura  
723 Bush; LB: Long Bay Park; WP: Waitakere Park). The numbers for individual rats (eight  
724 per location) are plotted in grey.  
725

726  
727

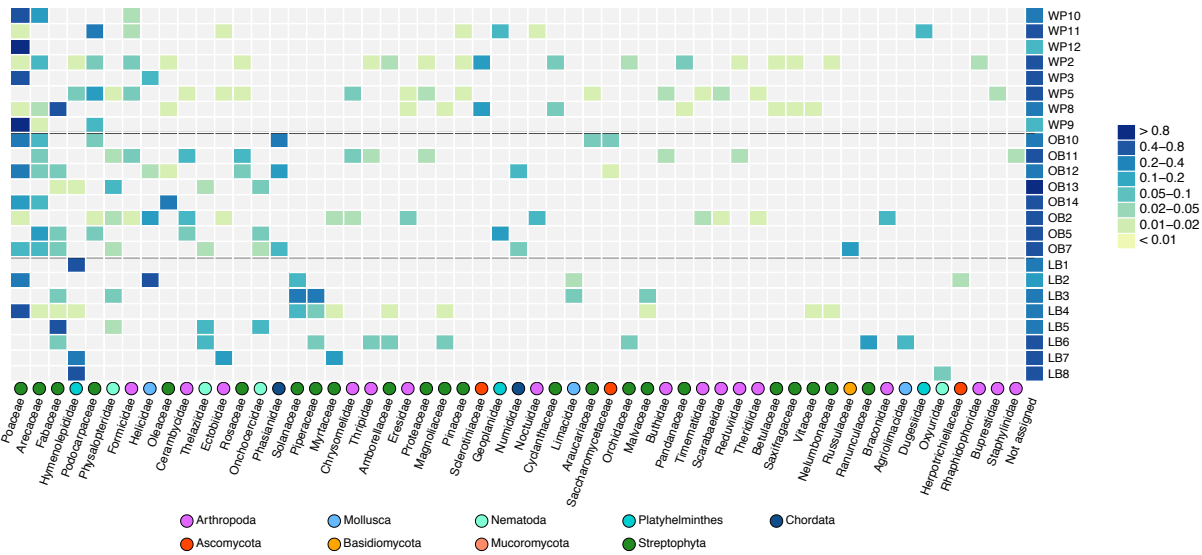

728

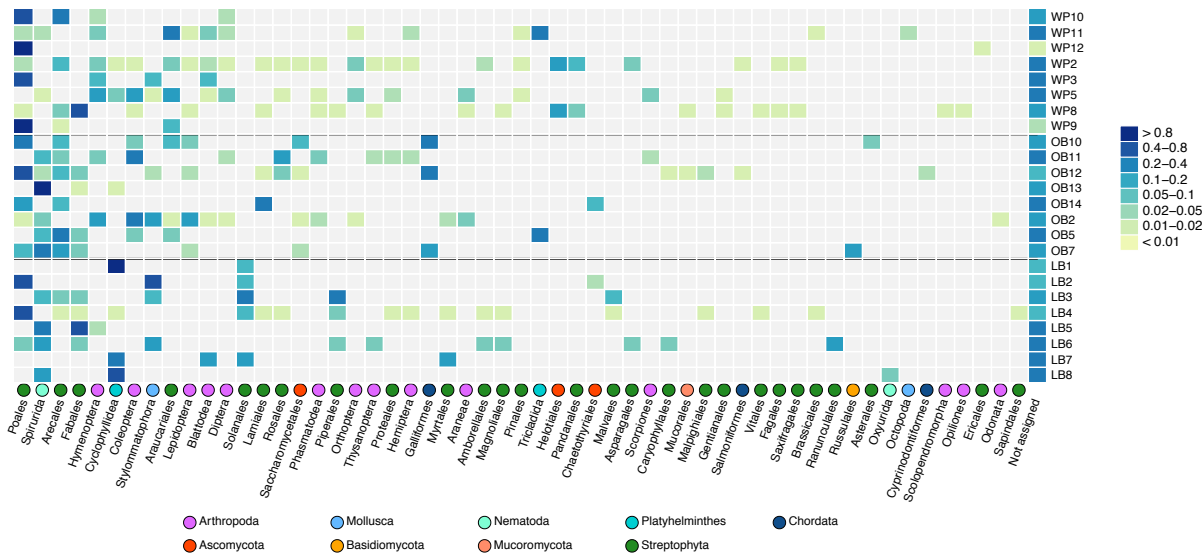

729

730 **Fig. 6. Proportions of taxa in the diets of individual rats. (a) Reads assigned to taxa**  
 731 **at the family and (b) order level.** The rows correspond to a single rat, with the  
 732 proportions of reads for that rat assigned to each family or order indicated in shades of  
 733 blue and yellow. Reads that were not assigned to a specific family or order are  
 734 indicated at the right side of the figure. The families and orders have been sorted so  
 735 that the most common diet components appear on the left. Only the 55 most common  
 736 families are shown. Note that the color gradations presented on the scale are not linear.

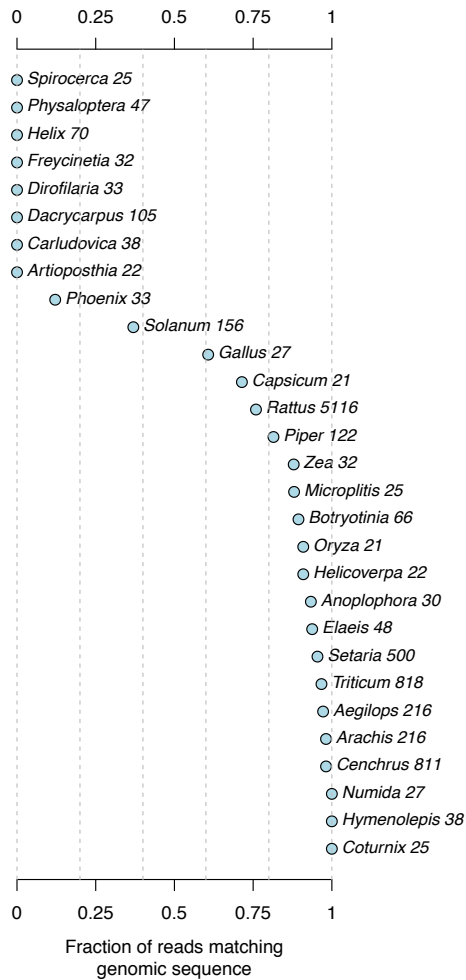

737

738 **Fig. 7.** Fractions of reads matching genomic and non-genomic sequence for the best  
739 BLAST hit of each read. For the species with largely complete genomes, the fraction of  
740 reads matching genomic sequence ranges from 60% to 100%. This large range is likely  
741 due to the tissue from which the DNA was isolated. For example, muscle tissue has a  
742 higher fraction of mtDNA to nuclear DNA than egg. For species without fully sequenced  
743 genomes, this fraction ranges from 0% to 20% (for species with a small amount of  
744 genomic data present in the database).

745

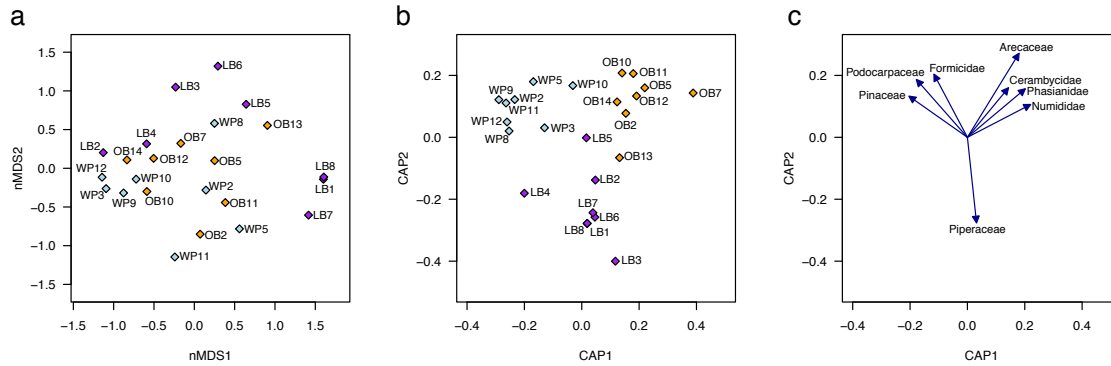

746

747 **Fig. 8. Unconstrained nMDS (a) and constrained CAP (b) ordinations of the diets of**  
748 **rats from three locations. Both ordinations were based on Bray-Curtis**  
749 **dissimilarities of square root transformed proportions of reads attributed to each**  
750 **family.** The locations were a native estuarine bush (OB, orange); a restored marine  
751 wetland (LB, purple); and a native forest (WP, light blue). The CAP ordination is  
752 repeated in panel (c) as a biplot with the rats omitted to show the Pearson correlations  
753 between families and the first two CAP axes. The eight families with the strongest  
754 correlations are shown, indicating the taxa associated with each location.

755

756

757 **Supplemental Tables**

758 **Table S1.** Read numbers and total base pairs for each barcode in the January  
759 sequencing run.

| <b>Rat</b>   | <b>Total reads</b> | <b>Total Mbp</b> | <b>Mean length</b> |
|--------------|--------------------|------------------|--------------------|
| <b>OB2</b>   | 19907              | 14.62            | 734                |
| <b>WP11</b>  | 10164              | 9.63             | 947                |
| <b>WP5</b>   | 8237               | 6.78             | 823                |
| <b>LB7</b>   | 7548               | 7.04             | 933                |
| <b>OB13</b>  | 3644               | 3.63             | 995                |
| <b>WP9</b>   | 2954               | 2.4              | 814                |
| <b>OB5</b>   | 2850               | 2.06             | 721                |
| <b>WP8</b>   | 2801               | 2.32             | 827                |
| <b>LB6</b>   | 2531               | 1.6              | 632                |
| <b>OB7</b>   | 2473               | 1.87             | 756                |
| <b>LB5</b>   | 1641               | 1.16             | 705                |
| <b>LB3</b>   | 1554               | 0.99             | 636                |
| <b>None</b>  | 16673              | 13.01            | 781                |
| <b>Total</b> | 82977              | 67.1             | N/A                |

760

761

762 **Table S2.** Read numbers and total base pairs for each barcode in the March  
763 sequencing run.

| <b>Barcode</b> | <b>Total reads</b> | <b>Total Mbp</b> | <b>Mean length</b> |
|----------------|--------------------|------------------|--------------------|
| <b>LB1</b>     | 17820              | 9.21             | 517                |
| <b>LB8</b>     | 16923              | 13.13            | 776                |
| <b>WP2</b>     | 10511              | 7.00             | 666                |
| <b>LB4</b>     | 8684               | 4.92             | 567                |
| <b>OB11</b>    | 5689               | 3.40             | 598                |
| <b>WP10</b>    | 1563               | 0.99             | 633                |
| <b>OB12</b>    | 1479               | 0.89             | 604                |
| <b>WP12</b>    | 1309               | 0.78             | 596                |
| <b>LB2</b>     | 1127               | 0.76             | 676                |
| <b>WP3</b>     | 637                | 0.73             | 1141               |
| <b>OB14</b>    | 541                | 0.37             | 683                |
| <b>OB10</b>    | 435                | 0.24             | 555                |
| <b>None</b>    | 29432              | 21.33            | 725                |
| <b>Total</b>   | 96150              | 63.75            | N/A                |

764

765

766 **Table S3.** SIMPER analysis of family contributions to group similarities.

| <b>Family</b>          | <b>Average Abundance</b> | <b>Average Similarity</b> | <b>Similarity/SD</b> | <b>Percentage contribution</b> | <b>Group</b> |
|------------------------|--------------------------|---------------------------|----------------------|--------------------------------|--------------|
| <b>Hymenolepididae</b> | 3.37                     | 6.87                      | 0.34                 | 51.2                           | LB           |
| <b>Solanaceae</b>      | 1.57                     | 1.48                      | 0.34                 | 11.1                           | LB           |
| <b>Fabaceae</b>        | 1.74                     | 1.41                      | 0.44                 | 10.5                           | LB           |
| <b>Arecaceae</b>       | 2.86                     | 7.11                      | 1                    | 33.4                           | OB           |
| <b>Poaceae</b>         | 2.87                     | 4.82                      | 0.55                 | 22.7                           | OB           |
| <b>Fabaceae</b>        | 1.17                     | 1.98                      | 0.51                 | 9.3                            | OB           |
| <b>Phasianidae</b>     | 1.79                     | 1.67                      | 0.34                 | 7.9                            | OB           |
| <b>Poaceae</b>         | 5.08                     | 17.61                     | 0.62                 | 72.1                           | WP           |

767

768

769 **Table S4.** SIMPER analysis of family contributions to group dissimilarities.

| Species         | Average Abund Group1 | Average Abund Group2 | Avg. Dis-similarity | Dis-similarity /SD | % contrib | Group1 | Group2 |
|-----------------|----------------------|----------------------|---------------------|--------------------|-----------|--------|--------|
| Poaceae         | 1.95                 | 5.08                 | 15.15               | 1.04               | 16.74     | LB     | WP     |
| Poaceae         | 2.87                 | 5.08                 | 11.29               | 1.26               | 13.78     | OB     | WP     |
| Hymenolepididae | 3.37                 | 0.48                 | 10.8                | 0.73               | 11.93     | LB     | WP     |
| Hymenolepididae | 3.37                 | 0.29                 | 9.37                | 0.79               | 10.32     | LB     | OB     |
| Poaceae         | 1.95                 | 2.87                 | 8.37                | 1.1                | 9.22      | LB     | OB     |
| Arecaceae       | 0.05                 | 2.86                 | 6.99                | 1.41               | 7.7       | LB     | OB     |
| Arecaceae       | 2.86                 | 1.31                 | 5.92                | 1.29               | 7.23      | OB     | WP     |
| Fabaceae        | 1.74                 | 1.05                 | 6.14                | 0.67               | 6.78      | LB     | WP     |
| Podocarpaceae   | 0                    | 2.38                 | 5.34                | 0.83               | 5.9       | LB     | WP     |
| Podocarpaceae   | 0.71                 | 2.38                 | 4.82                | 0.99               | 5.88      | OB     | WP     |
| Fabaceae        | 1.74                 | 1.17                 | 4.87                | 0.81               | 5.37      | LB     | OB     |
| Fabaceae        | 1.17                 | 1.05                 | 4.31                | 0.84               | 5.26      | OB     | WP     |

770

771 **Datafile S1.** Table of read BLAST hits and assigned MEGAN taxa with no filters  
772 applied.

773 **Datafile S2.** Table of read BLAST hits and assigned MEGAN taxa for diet items, with  
774 reads reclassified at the family or order level by filtering on read length to alignment  
775 length ratio and percent identity.

## 776 Supplemental Figures

777 **Fig S1.** Biplots of read lengths and qualities for each barcode in the January and  
778 March runs.

779 **Fig S2.** Correlation of read accuracy with alignment characteristics. (a-c) Read  
780 accuracy is positively correlated with the percent identity of the top BLAST hit. Points  
781 show a subsample of reads; orange line indicates a running median; red dotted line is



782 the  $y=x$  line, which is expected if accuracy corresponds exactly to percent identity. (a)  
783 indicates the relationship for diet items; (b) for rats; and (c) for mice. **(d-f)** Read accuracy  
784 and alignment length show no significant relationship. Plots again are (d) diet items; (e)  
785 rats; and (f) mice. **(g-i)** Read accuracy and the ratio of read length to alignment length  
786 are positively correlated: more accurate reads are more likely to have long alignments  
787 relative to read length. Plots again are (g) diet items; (h) rats; and (i) mice.

788
